# Supplementary material for: Mental Health Screening Approaches for Resettling Refugees and Asylum Seekers: A Scoping Review
Source: MDPI journal article supplement (doi:10.3390/ijerph19063549), 2022-03-16
Supplement: s1 [file s1]

Appendix 4: Search Strategies

| Medline                                                                                                                                                                                        | Embase                                                                                                                                                                                         | PsycINFO                                                                                                                                                                                    | Cochrane CENTRAL                                                                                                                                                                               | CINAHL                                                                                                                                                                                                                                                                                                                                                                                     |
|------------------------------------------------------------------------------------------------------------------------------------------------------------------------------------------------|------------------------------------------------------------------------------------------------------------------------------------------------------------------------------------------------|---------------------------------------------------------------------------------------------------------------------------------------------------------------------------------------------|------------------------------------------------------------------------------------------------------------------------------------------------------------------------------------------------|--------------------------------------------------------------------------------------------------------------------------------------------------------------------------------------------------------------------------------------------------------------------------------------------------------------------------------------------------------------------------------------------|
| 1. (refugee* or migrant* or resettle* or immigra* or undocumented or newcomer*).ti,ab,kw.                                                                                                      | 1. (refugee* or migrant* or resettle* or immigra* or undocumented or newcomer*).ti,ab,kw.                                                                                                      | (refugee* or migrant* or resettle* or immigra* or undocumented or newcomer*).ti,ab,id.                                                                                                      | (refugee* or migrant* or resettle* or immigra* or undocumented or newcomer*).ti,ab,kw.                                                                                                         | TI ( (refugee* or migrant* or resettle* or immigra* or undocumented or newcomer*) ) OR AB ( (refugee* or migrant* or resettle* or immigra* or undocumented or newcomer*) )                                                                                                                                                                                                                 |
| 2. (asylum adj1 seeker).ti,ab,kw.                                                                                                                                                              | 2. (asylum adj1 seeker).ti,ab,kw.                                                                                                                                                              | (asylum adj1 seeker).ti,ab,id.                                                                                                                                                              | (asylum adj1 seeker).ti,ab,kw.                                                                                                                                                                 | TI (asylum N1 seeker) OR AB (asylum N1 seeker)                                                                                                                                                                                                                                                                                                                                             |
| 3. (Forc* adj2 (immigrant* or migrant* or migration or displace*)).ti,ab,kw.                                                                                                                   | 3. (Forc* adj2 (immigrant* or migrant* or migration or displace*)).ti,ab,kw.                                                                                                                   | (Forc* adj2 (immigrant* or migrant* or migration or displace*)).ti,ab,id.                                                                                                                   | (Forc* adj2 (immigrant* or migrant* or migration or displace*)).ti,ab,kw.                                                                                                                      | TI ( (Forc* N2 (immigrant* or migrant* or migration or displace*)) ) OR AB ( (Forc* N2 (immigrant* or migrant* or migration or displace*)) )                                                                                                                                                                                                                                               |
| 4. ((Undocumented or irregular) adj2 (immigrant* or migrant* or migration)).ti,ab,kw.                                                                                                          | 4. ((Undocumented or irregular) adj2 (immigrant* or migrant* or migration)).ti,ab,kw.                                                                                                          | ((Undocumented or irregular) adj2 (immigrant* or migrant* or migration)).ti,ab,id.                                                                                                          | ((Undocumented or irregular) adj2 (immigrant* or migrant* or migration)).ti,ab,kw.                                                                                                             | TI ( ((Undocumented or irregular) N2 (immigrant* or migrant* or migration)) ) OR AB ( ((Undocumented or irregular) N2 (immigrant* or migrant* or migration)) )                                                                                                                                                                                                                             |
| 5. exp Refugees/                                                                                                                                                                               | 5. Exp Refugee/                                                                                                                                                                                | Exp Refugees/                                                                                                                                                                               | exp Refugees/                                                                                                                                                                                  | (MH "Refugees+")                                                                                                                                                                                                                                                                                                                                                                           |
| 6. exp "Transients and Migrants"/                                                                                                                                                              | 6. Exp Migrant/                                                                                                                                                                                | Exp asylum seeking/                                                                                                                                                                         | exp "Transients and Migrants"/                                                                                                                                                                 | (MH "Immigrants+")                                                                                                                                                                                                                                                                                                                                                                         |
| 7. "Emigration and Immigration"/                                                                                                                                                               | 7. Exp Migration/                                                                                                                                                                              | Exp immigration/                                                                                                                                                                            | exp "Emigration and Immigration"/                                                                                                                                                              | (MH "Emigration and Immigration")                                                                                                                                                                                                                                                                                                                                                          |
| 8. or/1-7                                                                                                                                                                                      | 8. Or/ 1-7                                                                                                                                                                                     | Or/ 1-7                                                                                                                                                                                     | 1 or 2 or 3 or 4 or 5 or 6 or 7                                                                                                                                                                | S1 OR S2 OR S3 OR S4 OR S5 OR S6 OR S7                                                                                                                                                                                                                                                                                                                                                     |
| 9. (screen or screening or test or tests or tool or tools or instrument* or assess* or evaluation* or strateg* or diagnos* or protocol* or exam or exams or examination* or checklist*).ti,ab. | 9. (screen or screening or test or tests or tool or tools or instrument* or assess* or evaluation* or strateg* or diagnos* or protocol* or exam or exams or examination* or checklist*).ti,ab. | (screen or screening or test or tests or tool or tools or instrument* or assess* or evaluation* or strateg* or diagnos* or protocol* or exam or exams or examination* or checklist*).ti,ab. | (screen or screening or test or tests or tool or tools or instrument* or assess* or evaluation* or strateg* or diagnos* or protocol* or exam or exams or examination* or checklist*).ti,ab,kw. | TI ( (screen or screening or test or tests or tool or tools or instrument* or assess* or evaluation* or strateg* or diagnos* or protocol* or exam or exams or examination* or checklist*) ) OR AB ( (screen or screening or test or tests or tool or tools or instrument* or assess* or evaluation* or strateg* or diagnos* or protocol* or exam or exams or examination* or checklist*) ) |
| 10. Symptom assessment/                                                                                                                                                                        | 10. Symptom assessment/                                                                                                                                                                        | Exp symptom checklists/<br>Exp psychological assessment/                                                                                                                                    | Symptom Assessment/                                                                                                                                                                            | (MH "Clinical Assessment Tools") OR (MH "Mental Health Screening (Saba CCC)")                                                                                                                                                                                                                                                                                                              |
| 11. 9 or 10                                                                                                                                                                                    | 11. 9 or 10                                                                                                                                                                                    | 9 or 10 or 11                                                                                                                                                                               | 9 or 10                                                                                                                                                                                        | S9 OR S10                                                                                                                                                                                                                                                                                                                                                                                  |
| 12. ((mental adj1 health) or anxiet* or anxious* or depress* or ptsd or posttrauma* or post-trauma* or trauma or suicid* or bipolar* or psycholog* or psychiatr*).ti,ab,kw.                    | 12. ((mental adj1 health) or anxiet* or anxious* or depress* or ptsd or posttrauma* or post-trauma* or trauma or suicid* or bipolar* or psycholog* or psychiatr*).ti,ab,kw.                    | ((mental adj1 health) or anxiet* or anxious* or depress* or ptsd or posttrauma* or post-trauma* or trauma or suicid* or bipolar* or psycholog* or psychiatr*).ti,ab,id.                     | ((mental adj1 health) or anxiet* or anxious* or depress* or ptsd or posttrauma* or post-trauma* or trauma or suicid* or bipolar* or psycholog* or psychiatr*).ti,ab,kw.                        | TI ( ((mental N1 health) or anxiet* or anxious* or depress* or ptsd or posttrauma* or post-trauma* or trauma or suicid* or bipolar* or psycholog* or psychiatr*) ) OR AB ( ((mental N1 health) or anxiet* or anxious* or depress* or ptsd or posttrauma* or post-trauma* or trauma or suicid* or bipolar* or psycholog* or psychiatr*) )                                                   |
| 13. Mental Health/ or Depression/ or Anxiety/ or Stress disorder, post-traumatic/ or psychological distress/ or exp suicide/ or suicidal ideation/ or exp Mental Disorders/                    | 13. Mental Health/ or Depression/ or Anxiety/ or exp posttraumatic stress disorder/ or exp distress syndrome/ or exp suicide/ or exp suicidal behavior/ or exp Mental disease/                 | Exp Mental Health/ or exp Depression/ or exp anxiety/ or exp anxiety disorders/ or exp posttraumatic stress disorder/ or exp psychological stress/ or exp suicide/ or exp mental disorders/ | mental health/ or Depression/ or Anxiety/ or Stress Disorder, Post-Traumatic/ or exp Stress, Psychological/ or exp suicide/ or exp mental disorders/                                           | (MH "Mental Health") OR (MH "Depression") OR (MH "Anxiety") OR (MH "Stress Disorder, Post-Traumatic") OR (MH "Stress, Psychological+") OR (MH "suicide+") OR (MH "mental disorders+")                                                                                                                                                                                                      |
| 14. 12 or 13                                                                                                                                                                                   | 14. 12 or 13                                                                                                                                                                                   | 12 or 13                                                                                                                                                                                    | 12 or 13                                                                                                                                                                                       | S12 OR S13                                                                                                                                                                                                                                                                                                                                                                                 |
| 15. 8 and 11 and 14                                                                                                                                                                            | 15. 8 and 11 and 14                                                                                                                                                                            | 8 and 11 and 14                                                                                                                                                                             | 8 and 11 and 14                                                                                                                                                                                | S8 AND S11 AND S14 Limiters - Published Date: 19950101-20210131                                                                                                                                                                                                                                                                                                                            |
| 16. limit 15 to yr="1995 -Current"                                                                                                                                                             | 16. limit 15 to yr="1995 -Current"                                                                                                                                                             | limit 15 to yr="1995 -Current"                                                                                                                                                              | limit 15 to yr="1995 -Current"                                                                                                                                                                 |                                                                                                                                                                                                                                                                                                                                                                                            |

| RESULTS                                                                                                                                                                                                                                                                                                                                                                                                                                                                                                                                                                                                                                                                                                                                                                                                                                                                                                                                                                                                                                                                                                                                                                                                                                                                                                                                                      | RESULTS                                                                                                                                                                                                                                                                                                                                                                                                                                                                                                                                                                                                                                                                                                                                                                                                                                                                                                                                                                                                                                                                                                                                                                                                                                                                                                            | RESULTS                                                                                                                                                                                                                                                                                                                                                                                                                                                                                                                                                                                                                                                                                                                                                                                                                                                                                                                                                                                                                                                                                                                                                                                                                                                                                                                                                                                                 | RESULTS                                                                                                                                                                                                                                                                                                                                                                                                                                                                                                                                                                                                                                                                                                                                                                                                                                                                                                                                                                                                                                                                                                                                                                                                                                                                                                                                                                        | RESULTS                                                                                                                                                                                                                                                                                                                                                                                                                                                                                                                                                                                                                                                                                                                                                                                                                                                                                                                                                                                                                                                                                                                                                                                                                                                                                                                                                                                                                                                                                                                                                                                                                                                                                                                                                                                                                                                                                                                                                                                                                                                                                   |
|--------------------------------------------------------------------------------------------------------------------------------------------------------------------------------------------------------------------------------------------------------------------------------------------------------------------------------------------------------------------------------------------------------------------------------------------------------------------------------------------------------------------------------------------------------------------------------------------------------------------------------------------------------------------------------------------------------------------------------------------------------------------------------------------------------------------------------------------------------------------------------------------------------------------------------------------------------------------------------------------------------------------------------------------------------------------------------------------------------------------------------------------------------------------------------------------------------------------------------------------------------------------------------------------------------------------------------------------------------------|--------------------------------------------------------------------------------------------------------------------------------------------------------------------------------------------------------------------------------------------------------------------------------------------------------------------------------------------------------------------------------------------------------------------------------------------------------------------------------------------------------------------------------------------------------------------------------------------------------------------------------------------------------------------------------------------------------------------------------------------------------------------------------------------------------------------------------------------------------------------------------------------------------------------------------------------------------------------------------------------------------------------------------------------------------------------------------------------------------------------------------------------------------------------------------------------------------------------------------------------------------------------------------------------------------------------|---------------------------------------------------------------------------------------------------------------------------------------------------------------------------------------------------------------------------------------------------------------------------------------------------------------------------------------------------------------------------------------------------------------------------------------------------------------------------------------------------------------------------------------------------------------------------------------------------------------------------------------------------------------------------------------------------------------------------------------------------------------------------------------------------------------------------------------------------------------------------------------------------------------------------------------------------------------------------------------------------------------------------------------------------------------------------------------------------------------------------------------------------------------------------------------------------------------------------------------------------------------------------------------------------------------------------------------------------------------------------------------------------------|--------------------------------------------------------------------------------------------------------------------------------------------------------------------------------------------------------------------------------------------------------------------------------------------------------------------------------------------------------------------------------------------------------------------------------------------------------------------------------------------------------------------------------------------------------------------------------------------------------------------------------------------------------------------------------------------------------------------------------------------------------------------------------------------------------------------------------------------------------------------------------------------------------------------------------------------------------------------------------------------------------------------------------------------------------------------------------------------------------------------------------------------------------------------------------------------------------------------------------------------------------------------------------------------------------------------------------------------------------------------------------|-------------------------------------------------------------------------------------------------------------------------------------------------------------------------------------------------------------------------------------------------------------------------------------------------------------------------------------------------------------------------------------------------------------------------------------------------------------------------------------------------------------------------------------------------------------------------------------------------------------------------------------------------------------------------------------------------------------------------------------------------------------------------------------------------------------------------------------------------------------------------------------------------------------------------------------------------------------------------------------------------------------------------------------------------------------------------------------------------------------------------------------------------------------------------------------------------------------------------------------------------------------------------------------------------------------------------------------------------------------------------------------------------------------------------------------------------------------------------------------------------------------------------------------------------------------------------------------------------------------------------------------------------------------------------------------------------------------------------------------------------------------------------------------------------------------------------------------------------------------------------------------------------------------------------------------------------------------------------------------------------------------------------------------------------------------------------------------------|
| <p>Date of search: 22 December 2020<br/>Database: Ovid MEDLINE(R) ALL &lt;1946 to December 21, 2020&gt;</p> <p>1 (refugee* or migrant* or resettle* or immigra* or undocumented or newcomer*).ti,ab,kw. (63929)<br/>2 (asylum adj1 seeker).ti,ab,kw. (227)<br/>3 (Forc* adj2 (immigrant* or migrant* or migration or displace*)).ti,ab,kw. (3010)<br/>4 ((Undocumented or irregular) adj2 (immigrant* or migrant* or migration)).ti,ab,kw. (872)<br/>5 exp Refugees/ (10556)<br/>6 exp "Transients and Migrants"/ (11965)<br/>7 "Emigration and Immigration"/ (25319)<br/>8 or/1-7 (84823)<br/>9 (screen or screening or test or tests or tool or tools or instrument* or assess* or evaluation* or strateg* or diagnos* or protocol* or exam or exams or examination* or checklist*).ti,ab. (9162885)<br/>10 Symptom assessment/ (5435)<br/>11 9 or 10 (9164234)<br/>12 ((mental adj1 health) or anxiet* or anxious* or depress* or ptsd or posttrauma* or post-trauma* or trauma or suicid* or bipolar* or psycholog* or psychiatr*).ti,ab,kw. (1390982)<br/>13 Mental Health/ or Depression/ or Anxiety/ or Stress disorder, post-traumatic/ or psychological distress/ or exp suicide/ or suicidal ideation/ or exp Mental Disorders/ (1434058)<br/>14 12 or 13 (2277968)<br/>15 8 and 11 and 14 (6542)<br/>16 limit 15 to yr="1995 -Current" (6051)</p> | <p>Date of Search: 27 December 2020<br/>Database: Embase &lt;1974 to 2020 December 24&gt;</p> <p>1 (refugee* or migrant* or resettle* or immigra* or undocumented or newcomer*).ti,ab,kw. (72506)<br/>2 (asylum adj1 seeker).ti,ab,kw. (391)<br/>3 (Forc* adj2 (immigrant* or migrant* or migration or displace*)).ti,ab,kw. (3411)<br/>4 ((Undocumented or irregular) adj2 (immigrant* or migrant* or migration)).ti,ab,kw. (996)<br/>5 exp Refugee/ (13804)<br/>6 exp Migrant/ (39229)<br/>7 exp Migration/ (45312)<br/>8 or/1-7 (107657)<br/>9 (screen or screening or test or tests or tool or tools or instrument* or assess* or evaluation* or strateg* or diagnos* or protocol* or exam or exams or examination* or checklist*).ti,ab. (12315280)<br/>10 Symptom assessment/ (8161)<br/>11 9 or 10 (12316994)<br/>12 ((mental adj1 health) or anxiet* or anxious* or depress* or ptsd or posttrauma* or post-trauma* or trauma or suicid* or bipolar* or psycholog* or psychiatr*).ti,ab,kw. (1837053)<br/>13 Mental Health/ or Depression/ or Anxiety/ or exp posttraumatic stress disorder/ or exp distress syndrome/ or exp suicide/ or exp suicidal behavior/ or exp Mental disease/ (2396907)<br/>14 12 or 13 (3289391)<br/>15 8 and 11 and 14 (9159)<br/>16 limit 15 to yr="1995 -Current" (8656)</p> | <p>Date of search: 29 December 2020<br/>Database: APA PsycInfo &lt;1806 to December Week 3 2020&gt;</p> <p>1 (refugee* or migrant* or resettle* or immigra* or undocumented or newcomer*).ti,ab,id. (50344)<br/>2 (asylum adj1 seeker).ti,ab,id. (240)<br/>3 (Forc* adj2 (immigrant* or migrant* or migration or displace*)).ti,ab,id. (746)<br/>4 ((Undocumented or irregular) adj2 (immigrant* or migrant* or migration)).ti,ab,id. (901)<br/>5 exp Refugees/ (6404)<br/>6 exp asylum seeking/ (643)<br/>7 exp immigration/ (22978)<br/>8 or/1-7 (51894)<br/>9 (screen or screening or test or tests or tool or tools or instrument* or assess* or evaluation* or strateg* or diagnos* or protocol* or exam or exams or examination* or checklist*).ti,ab. (1967740)<br/>10 exp symptom checklists/ (811)<br/>11 exp psychological assessment/ (109843)<br/>12 9 or 10 or 11 (1995993)<br/>13 ((mental adj1 health) or anxiet* or anxious* or depress* or ptsd or posttrauma* or post-trauma* or trauma or suicid* or bipolar* or psycholog* or psychiatr*).ti,ab,id. (1320454)<br/>14 exp Mental Health/ or exp Depression/ or exp anxiety/ or exp anxiety disorders/ or exp posttraumatic stress disorder/ or exp psychological stress/ or exp suicide/ or exp mental disorders/ (1014623)<br/>15 13 or 14 (1776057)<br/>16 8 and 12 and 15 (7511)<br/>17 limit 16 to yr="1995 -Current" (6892)</p> | <p>Date of search: 15 January 2020<br/>Database: Cochrane Central Register of Controlled Trials &lt;1991 to January Week 2 2021&gt;</p> <p>1 (refugee* or migrant* or resettle* or immigra* or undocumented or newcomer*).ti,ab,kw. (1743)<br/>2 (asylum adj1 seeker).ti,ab,kw. (19)<br/>3 (Forc* adj2 (immigrant* or migrant* or migration or displace*)).ti,ab,kw. (114)<br/>4 ((Undocumented or irregular) adj2 (immigrant* or migrant* or migration)).ti,ab,kw. (8)<br/>5 exp Refugees/ (115)<br/>6 exp "Transients and Migrants"/ (71)<br/>7 exp "Emigration and Immigration"/ (64)<br/>8 1 or 2 or 3 or 4 or 5 or 6 or 7 (1886)<br/>9 (screen or screening or test or tests or tool or tools or instrument* or assess* or evaluation* or strateg* or diagnos* or protocol* or exam or exams or examination* or checklist*).ti,ab,kw. (948121)<br/>10 Symptom Assessment/ (238)<br/>11 9 or 10 (948166)<br/>12 ((mental adj1 health) or anxiet* or anxious* or depress* or ptsd or posttrauma* or post-trauma* or trauma or suicid* or bipolar* or psycholog* or psychiatr*).ti,ab,kw. (176680)<br/>13 mental health/ or Depression/ or Anxiety/ or Stress Disorder, Post-Traumatic/ or exp Stress, Psychological/ or exp suicide/ or exp mental disorders/ (85313)<br/>14 12 or 13 (217701)<br/>15 8 and 11 and 14 (472)<br/>16 limit 15 to yr="1995 -Current" (471)</p> | <p>Date of search: 15 January 2020<br/>Database: CINAHL &lt;1981 to January Week 2 2021&gt;</p> <p>TI ( (refugee* or migrant* or resettle* or immigra* or undocumented or newcomer*) ) OR AB ( (refugee* or migrant* or resettle* or immigra* or undocumented or newcomer*) ) (27931)<br/>2. TI (asylum N1 seeker) OR AB (asylum N1 seeker) (915)<br/>3. TI ( (Forc* N2 (immigrant* or migrant* or migration or displace*) ) ) OR AB ( (Forc* N2 (immigrant* or migrant* or migration or displace*)) ) (743)<br/>4. TI ( (((Undocumented or irregular) N2 (immigrant* or migrant* or migration))) ) OR AB ( (((Undocumented or irregular) N2 (immigrant* or migrant* or migration))) ) (631)<br/>5. (MH "Refugees+") (7505)<br/>6. (MH "Immigrants+") (14996)<br/>7. (MH "Emigration and Immigration") (6701)<br/>8. S1 OR S2 OR S3 OR S4 OR S5 OR S6 OR S7 (38475)<br/>9. TI ( (screen or screening or test or tests or tool or tools or instrument* or assess* or evaluation* or strateg* or diagnos* or protocol* or exam or exams or examination* or checklist*) ) OR AB ( (screen or screening or test or tests or tool or tools or instrument* or assess* or evaluation* or strateg* or diagnos* or protocol* or exam or exams or examination* or checklist*) ) (2073321)<br/>10. (MH "Clinical Assessment Tools") OR (MH "Mental Health Screening (Saba CCC)" (166014)<br/>11. S9 OR S10 (2137518)<br/>12. TI ( ((mental N1 health) or anxiet* or anxious* or depress* or ptsd or posttrauma* or post-trauma* or trauma or suicid* or bipolar* or psycholog* or psychiatr*) ) OR AB ( ((mental N1 health) or anxiet* or anxious* or depress* or ptsd or posttrauma* or post-trauma* or trauma or suicid* or bipolar* or psycholog* or psychiatr*) ) (517945)<br/>13. (MH "Mental Health") OR (MH "Depression") OR (MH "Anxiety") OR (MH "Stress Disorder, Post-Traumatic") OR (MH "Stress, Psychological+") OR (MH "suicide+") OR (MH "mental disorders+") (695484)<br/>14. S12 OR S13 (956890)<br/>15. S8 AND S11 AND S14 Limiters - Published Date: 19950101-20210131 (3787)</p> |
