# Supplementary material for: Mental Health Screening Approaches for Resettling Refugees and Asylum Seekers: A Scoping Review
Source: MDPI journal article supplement (doi:10.3390/ijerph19063549), 2022-03-16
Supplement: s1 [file s1]

| Authors                                                                                                                                                                                           | Published Year | Title                                                                                                                                                                                                   | Journal                                                               | Volume | Issue        | Pages     | DOI                                                   | Notes                                                      |
|---------------------------------------------------------------------------------------------------------------------------------------------------------------------------------------------------|----------------|---------------------------------------------------------------------------------------------------------------------------------------------------------------------------------------------------------|-----------------------------------------------------------------------|--------|--------------|-----------|-------------------------------------------------------|------------------------------------------------------------|
| Abdalla, Kirsten; Elkhit, Ask                                                                                                                                                                     | 2001           | A nation-wide screening of refugee children from Kosovo.                                                                                                                                                | Psychologisk Paedagogisk Radvining                                    | 38     | 5            | 339-348   |                                                       | Exclusion reason: Full text unavailable;                   |
| Acarturk, Ceren; McGrath, Michael; Roberts, Bayard; Ilkkursun, Zeynep; Cuijpers, Pim; Sijbrandij, Marit; Sondorp, Egbert; Ventevogel, Peter; McKee, Martin; Fuhr, Daniela C; STRENGTHS consortium | 2020           | Prevalence and predictors of common mental disorders among Syrian refugees in Istanbul, Turkey: a cross-sectional study.                                                                                | Social psychiatry and psychiatric epidemiology                        |        | uvp, 8804358 |           | <a href="https://dx.doi.org/">https://dx.doi.org/</a> | Exclusion reason: Ineligible study design;                 |
| Achenbach, Thomas M; Becker, Andreas; Dopfner, Manfred; Heiervang, Einar; Roessner, Veit; Steinhausen, Hans-Christoph; Rothenberger, Aribert                                                      | 2008           | Multicultural assessment of child and adolescent psychopathology with ASEBA and SDQ instruments: research findings, applications, and future directions.                                                | Journal of child psychology and psychiatry, and allied disciplines    | 49     | 3            | 251-75    | <a href="https://dx.doi.org/">https://dx.doi.org/</a> | Exclusion reason: Population is not refugee/asylum seeker; |
| Acquaye, Hannah E                                                                                                                                                                                 | 2018           | Assessing the factor structure of models for posttraumatic stress disorder symptoms in a war-related civilian sample.                                                                                   | Counseling Outcome Research and Evaluation                            | 9      | 2            | 90-101    | <a href="http://dx.doi.org/">http://dx.doi.org/</a>   | Exclusion reason: Not along resettlement pathway;          |
| Ahmad F, Shakya Y, Li J, Khoaja K, Norman CD, Lou W, Abuelaish I, Ahmadzi HM                                                                                                                      | 2012           | A pilot with computer-assisted psychosocial risk-assessment for refugees                                                                                                                                |                                                                       | 12     |              | 71        |                                                       | Exclusion reason: Not along resettlement pathway;          |
| Ahmad, A; Sundelin-Wahlsten, V; Sofi, M A; Qahar, J A; von Knorring, A L                                                                                                                          | 2000           | Reliability and validity of a child-specific cross-cultural instrument for assessing posttraumatic stress disorder.                                                                                     | European child & adolescent psychiatry                                | 9      | 4            | 285-94    |                                                       | Exclusion reason: Not along resettlement pathway;          |
| Ahmad, Abdulbaghi; Mohamed, Hawar T; Ameen, Nazar M                                                                                                                                               | 1998           | A 26-month follow-up of posttraumatic stress symptoms in children after the mass-escape tragedy in Iraqi Kurdistan.                                                                                     | Nordic Journal of Psychiatry                                          | 52     | 5            | 357-366   | <a href="http://dx.doi.org/">http://dx.doi.org/</a>   | Exclusion reason: Not along resettlement pathway;          |
| Akgul, Sinem; Husnu, Senel; Derman, Orhan; Ozmert, Elif; Bideci, Aysun; Hasanoglu, Enver                                                                                                          | 2019           | Mental health of Syrian refugee adolescents: how far have we come?.                                                                                                                                     | The Turkish journal of pediatrics                                     | 61     | 6            | 839-845   | <a href="https://dx.doi.org/">https://dx.doi.org/</a> | Exclusion reason: Not along resettlement pathway;          |
| Al-Amer, Rasmieh; Maneze, Della; Ramjan, Lucie; Villarosa, Amy R; Darwish, Rima; Salamonson, Yenna                                                                                                | 2020           | Psychometric testing of the Arabic version of the Patient Health Questionnaire among adolescent refugees living in Jordan.                                                                              | International journal of mental health nursing                        | 29     | 4            | 685-692   | <a href="https://dx.doi.org/">https://dx.doi.org/</a> | Exclusion reason: Not along resettlement pathway;          |
| Andersen, Mathilde Horn; Kruse, Alexandra; Frederiksen, Hanne Winther; Ahmadi, Afsaneh; Norredam, Marie                                                                                           | 2020           | Health status of refugees newly resettled in Denmark.                                                                                                                                                   | Danish medical journal                                                | 67     | 12           |           |                                                       | Exclusion reason: Ineligible study design;                 |
| Ao, Trong; Shetty, Sharmila; Sivilli, Teresa; Blanton, Curtis; Ellis, Heidi; Geltman, Paul L; Cochran, Jennifer; Taylor, Eboni; Lankau, Emily W; Lopes Cardozo, Barbara                           | 2016           | Suicidal Ideation and Mental Health of Bhutanese Refugees in the United States.                                                                                                                         | Journal of immigrant and minority health                              | 18     | 4            | 828-835   | <a href="https://dx.doi.org/">https://dx.doi.org/</a> | Exclusion reason: Ineligible study design;                 |
| Aoun, A.; Joundi, J.; El Gerges, N.; El Jabbour, F.; El Osta, L.                                                                                                                                  |                | SUN-P160: Eating Disorders and Post-Traumatic Stress Disorder Among Syrian Refugees in North Lebanon: Screening and Correlation.                                                                        | Clinical Nutrition                                                    | 36     |              | S113-S113 | 10.1016/S0261-5                                       | Exclusion reason: Ineligible study design;                 |
| Arfken, Cynthia L; Alsaud, Mohammed; Mischel, Edward F; Haddad, Luay; Sonderman, Samantha; Lister, Jamey J; Javanbakht, Arash                                                                     | 2018           | Recent Iraqi refugees: Association between ethnic identification and psychological distress.                                                                                                            | Journal of Muslim Mental Health                                       | 12     | 2            | 1-12      |                                                       | Exclusion reason: Ineligible study design;                 |
| Bailliet, Cecilia M                                                                                                                                                                               | 2009           | Towards the restoration of individualized assessment of mental health in refugee law.                                                                                                                   | Tidsskrift for Norsk Psykologforening                                 | 46     | 12           | 1163-1168 |                                                       | Exclusion reason: Ineligible study design;                 |
| Banerjee T.; Ajmal S.; Khan A.; Arora R.                                                                                                                                                          | 2019           | Health needs of unaccompanied asylum seeker children-observations from initial health assessment in community paediatric clinic                                                                         | Archives of Disease in Childhood                                      | 104    | Supplement 2 | A212      | <a href="http://dx.doi.org/">http://dx.doi.org/</a>   | Exclusion reason: Full text unavailable;                   |
| Bapolisi, Achille Mwira; Song, Suzan J; Kesande, Claire; Rukundo, Godfrey Zari; Ashaba, Scholastic                                                                                                | 2020           | Post-traumatic stress disorder, psychiatric comorbidities and associated factors among refugees in Nakivale camp in southwestern Uganda.                                                                | BMC psychiatry                                                        | 20     | 1            | 53        | <a href="https://dx.doi.org/">https://dx.doi.org/</a> | Exclusion reason: Not along resettlement pathway;          |
| Baranowski, Kim A                                                                                                                                                                                 | 2020           | Documenting human rights violations: An introduction to the psychological evaluation of asylum seekers.                                                                                                 | Practice Innovations                                                  | 5      | 1            | 32-44     | <a href="http://dx.doi.org/">http://dx.doi.org/</a>   | Exclusion reason: Not a screening program;                 |
| Baranowski, Kim A; Moses, Melissa H; Sundri, Jasmine                                                                                                                                              | 2018           | Supporting Asylum Seekers: Clinician Experiences of Documenting Human Rights Violations Through Forensic Psychological Evaluation.                                                                      | Journal of traumatic stress                                           | 31     | 3            | 391-400   | <a href="https://dx.doi.org/">https://dx.doi.org/</a> | Exclusion reason: Duplicate;                               |
| Barthel, Dana; Ravens-Sieberger, Ulrike; Schulte-Markwort, Michael; Klasen, Fionna; Zindler, Areej                                                                                                | 2019           | The clinical-psychological diagnostic process in an outpatient health-care center for refugee children and adolescents: First results of mental health problems, traumatic events, and treatment goals. | Kindheit und Entwicklung: Zeitschrift für Klinische Kinderpsychologie | 28     | 3            | 160-172   | <a href="http://dx.doi.org/">http://dx.doi.org/</a>   | Exclusion reason: Not a screening program;                 |
| Basheti, Iman A; Ayasrah, Shahnaz M; Basheti, Mariam M; Mahfuz, Judeh; Chaar, Betty                                                                                                               | 2019           | The Syrian refugee crisis in Jordan: a cross sectional pharmacist-led study assessing post-traumatic stress disorder.                                                                                   | Pharmacy practice                                                     | 17     | 3            | 1475      | <a href="https://dx.doi.org/">https://dx.doi.org/</a> | Exclusion reason: Not along resettlement pathway;          |
| Bastin, Pierre; Bastard, Mathieu; Rossel, Ludovic; Melgar, Pablo; Jones, Alison; Antierens, Annick                                                                                                | 2013           | Description and predictive factors of individual outcomes in a refugee camp based mental health intervention (Beirut, Lebanon).                                                                         | PloS one                                                              | 8      | 1            | e54107    | <a href="https://dx.doi.org/">https://dx.doi.org/</a> | Exclusion reason: Not along resettlement pathway;          |

| Authors                                                                                                                                                                                                                     | Published Year | Title                                                                                                                                                                        | Journal                                                                                        | Volume | Issue        | Pages         | DOI                                                                                                                 | Notes                                             |
|-----------------------------------------------------------------------------------------------------------------------------------------------------------------------------------------------------------------------------|----------------|------------------------------------------------------------------------------------------------------------------------------------------------------------------------------|------------------------------------------------------------------------------------------------|--------|--------------|---------------|---------------------------------------------------------------------------------------------------------------------|---------------------------------------------------|
| Bean, Tammy; Derluyn, Ilse; Eurelings-Bontekoe, Elisabeth; Broekaert, Eric; Spinhoven, Philip                                                                                                                               | 2007           | Validation of the multiple language versions of the Hopkins Symptom Checklist-37 for refugee adolescents.                                                                    | Adolescence                                                                                    | 42     | 165          | 51-71         |                                                                                                                     | Exclusion reason: Not along resettlement pathway; |
| Bean, Tammy; Mooijart, Ab; Eurelings-Bontekoe, Elisabeth; Spinhoven, Philip                                                                                                                                                 | 2006           | Validation of the child behavior checklist for guardians of unaccompanied refugee minors.                                                                                    | Children and Youth Services Review                                                             | 28     | 8            | 867-887       | <a href="http://dx.doi.org/10.1016/j.chy.2006.05.001">http://dx.doi.org/10.1016/j.chy.2006.05.001</a>               | Exclusion reason: Not along resettlement pathway; |
| Bell, Sue Anne; Lori, Jody; Redman, Richard; Seng, Julia                                                                                                                                                                    | 2015           | Development of a brief screening tool for women's mental health assessment in refugee settings: A psychometric evaluation.                                                   | International journal of nursing studies                                                       | 52     | 7            | 1202-8        | <a href="https://dx.doi.org/10.1016/j.ijnurstu.2015.04.001">https://dx.doi.org/10.1016/j.ijnurstu.2015.04.001</a>   | Exclusion reason: Not along resettlement pathway; |
| Bell, Sue Anne; Lori, Jody; Redman, Richard; Seng, Julia                                                                                                                                                                    | 2015           | Psychometric Validation and Comparison of the Self-Reporting Questionnaire-20 and Self-Reporting Questionnaire-Suicidal Ideation and Behavior Among Congolese Refugee Women. | Journal of nursing measurement                                                                 | 23     | 3            | 393-408       | <a href="https://dx.doi.org/10.1016/j.nurme.2015.04.001">https://dx.doi.org/10.1016/j.nurme.2015.04.001</a>         | Exclusion reason: Not along resettlement pathway; |
| Belz, Maria; Belz, Michael; Ozkan, Ibrahim; Graef-Callies, Iris T                                                                                                                                                           | 2017           | Posttraumatic stress disorder and comorbid depression among refugees: Assessment of a sample from a German refugee reception center.                                         | Transcultural psychiatry                                                                       | 54     | 5-6          | 595-610       | <a href="https://dx.doi.org/10.1016/j.psc.2017.04.001">https://dx.doi.org/10.1016/j.psc.2017.04.001</a>             | Exclusion reason: No mental health screening;     |
| Bertelsen N.S.; Selden E.; Krass P.; Keatley E.S.; Keller A.                                                                                                                                                                | 2016           | Primary care screening methods and outcomes among asylum seekers in New York City                                                                                            | Annals of Global Health                                                                        | 82     | 3            | 432           |                                                                                                                     | Exclusion reason: conference poster/ abstract;    |
| Berthold, S Megan; Mollica, Richard F; Silove, Derrick; Tay, Alvin Kuowei; Lavelle, James; Lindert, Jutta                                                                                                                   | 2019           | HTQ-5: revision of the Harvard Trauma Questionnaire for measuring torture, trauma and DSM-5 PTSD symptoms in refugee populations.                                            | European Journal of Public Health                                                              | 29     | 3            | 468-474       | 10.1093/eurpub/ckz001                                                                                               | Exclusion reason: Not a screening program;        |
| Berthold, S Megan; Mollica, Richard F; Silove, Derrick; Tay, Alvin Kuowei; Lindert, James; Lindert, Jutta                                                                                                                   | 2019           | The HTQ-5: revision of the Harvard Trauma Questionnaire for measuring torture, trauma and DSM-5 PTSD symptoms in refugee populations.                                        | European journal of public health                                                              | 29     | 3            | 468-474       | <a href="https://dx.doi.org/10.1093/eurpub/ckz001">https://dx.doi.org/10.1093/eurpub/ckz001</a>                     | Exclusion reason: Duplicate;                      |
| Betancourt, Theresa S; Yudron, Monica; Wheaton, Wendy; Smith-Fawzi, Mary C                                                                                                                                                  | 2012           | Caregiver and adolescent mental health in Ethiopian Kunama refugees participating in an emergency education program.                                                         | The Journal of adolescent health : official publication of the Society for Adolescent Medicine | 51     | 4            | 357-65        | <a href="https://dx.doi.org/10.1016/j.jadhealth.2012.04.001">https://dx.doi.org/10.1016/j.jadhealth.2012.04.001</a> | Exclusion reason: Ineligible study design;        |
| Biddle, Louise; Miners, Alec; Bozorgmehr, Kayvan                                                                                                                                                                            | 2019           | Cost-utility of screening for depression among asylum seekers: a modelling study in Germany.                                                                                 | Health policy (Amsterdam, Netherlands)                                                         | 123    | 9            | 873-881       | <a href="https://dx.doi.org/10.1016/j.healthpol.2019.04.001">https://dx.doi.org/10.1016/j.healthpol.2019.04.001</a> | Exclusion reason: Ineligible study design;        |
| Bishop D.; Altshuler M.; Scott K.; Panzer J.; Mills G.; McManus P.                                                                                                                                                          | 2012           | The refugee medical exam: What you need to do                                                                                                                                | Journal of Family Practice                                                                     | 61     | 12           | E1-E10        |                                                                                                                     | Exclusion reason: Ineligible study design;        |
| Blair, R G                                                                                                                                                                                                                  | 2000           | Risk factors associated with PTSD and major depression among Cambodian refugees in Utah.                                                                                     | Health & social work                                                                           | 25     | 1            | 23-30         |                                                                                                                     | Exclusion reason: Not along resettlement pathway; |
| Blight, Karin Johansson; Ekblad, Solvig; Persson, Jan-Olov; Ekberg, Jan                                                                                                                                                     | 2006           | Mental health, employment and gender. Cross-sectional evidence in a sample of refugees from Bosnia-Herzegovina living in two Swedish regions.                                | Social science & medicine (1982)                                                               | 62     | 7            | 1697-709      |                                                                                                                     | Exclusion reason: Not along resettlement pathway; |
| Boyle, Jacqueline Anne; Willey, Suzanne; Blackmore, Rebecca; East, Christine; McBride, Jacqueline; Gray, Kylie; Melvin, Glenn; Fradkin, Rebecca; Ball, Natahl; Hight, Nicole; Gibson-Helm, Melanie                          | 2019           | Improving Mental Health in Pregnancy for Refugee Women: Protocol for the Implementation and Evaluation of a Screening Program in Melbourne, Australia.                       | Journal of Medical Internet Research                                                           | 21     | 8            | N.PAG-N.PAG   | 10.2196/13271                                                                                                       | Exclusion reason: Ineligible study design;        |
| Bradley, Lloyd; Tawfiq, Nouran                                                                                                                                                                                              | 2006           | The physical and psychological effects of torture in Kurds seeking asylum in the United Kingdom.                                                                             | Torture : quarterly journal on rehabilitation of torture victims and prevention of torture     | 16     | 1            | 41-7          |                                                                                                                     | Exclusion reason: Not along resettlement pathway; |
| Brakemeier, Eva-Lotta; Zimmermann, Johannes; Erz, Elina; Bollmann, Simon; Rump, Simon; von Kempf, Viktoria; Grossmuller, Tanita; Mitelman, Avija; Gehrisch, Johanna; Spies, Jan; Storck, Timo; Schouler-Ocak, Meryam        | 2017           | Interpersonal integrative pilot project for refugees with mental disorders. Presentation of the project and initial results on feasibility and outcome.                      | Psychotherapeut                                                                                | 62     | 4            | 322-332       | <a href="http://dx.doi.org/10.1007/s00149-017-1001-1">http://dx.doi.org/10.1007/s00149-017-1001-1</a>               | Exclusion reason: Full text unavailable;          |
| Briggs, Lynne                                                                                                                                                                                                               | 2011           | Demoralization and psychological distress in refugees: From research to practice.                                                                                            | Social Work in Mental Health                                                                   | 9      | 5            | 336-345       | <a href="http://dx.doi.org/10.1080/15332985.2011.588888">http://dx.doi.org/10.1080/15332985.2011.588888</a>         | Exclusion reason: Not a screening program;        |
| Bronstein, Israel; Montgomery, Paul; Dobrowski, Stephanie                                                                                                                                                                   | 2012           | PTSD in asylum-seeking male adolescents from Afghanistan.                                                                                                                    | Journal of traumatic stress                                                                    | 25     | 5            | 551-7         | <a href="https://dx.doi.org/10.1002/jts.21701">https://dx.doi.org/10.1002/jts.21701</a>                             | Exclusion reason: Ineligible study design;        |
| Bronstein, Israel; Montgomery, Paul; Ott, Eleanor                                                                                                                                                                           | 2013           | Emotional and behavioural problems amongst Afghan unaccompanied asylum-seeking children: results from a large-scale cross-sectional study.                                   | European child & adolescent psychiatry                                                         | 22     | 5            | 285-94        | <a href="https://dx.doi.org/10.1007/s00127-013-0701-1">https://dx.doi.org/10.1007/s00127-013-0701-1</a>             | Exclusion reason: Ineligible study design;        |
| Brown, Carina M; Swaminathan, Lalitha; Saif, Nadia T; Hauck, Fern R                                                                                                                                                         | 2020           | Health Care for Refugee and Immigrant Adolescents.                                                                                                                           | Primary care                                                                                   | 47     | 2            | 291-306       | <a href="https://dx.doi.org/10.1016/j.psc.2020.04.001">https://dx.doi.org/10.1016/j.psc.2020.04.001</a>             | Exclusion reason: Not a screening program;        |
| Brown, Chris; Schale, Codi L; Nilsson, Johanna E                                                                                                                                                                            | 2010           | Vietnamese immigrant and refugee women's mental health: An examination of age of arrival, length of stay, income, and English language proficiency.                          | Journal of Multicultural Counseling and Development                                            | 38     | 2            | 66-76         | <a href="http://dx.doi.org/10.1016/j.jmcd.2010.04.001">http://dx.doi.org/10.1016/j.jmcd.2010.04.001</a>             | Exclusion reason: Not along resettlement pathway; |
| Bryant, Richard A; Edwards, Ben; Creamer, Mark; O'Donnell, Meaghan; Forbes, David; Felmingham, Kim L; Silove, Derrick; Steel, Zachary; McFarlane, Alexander C; Van Hooff, Miranda; Nickerson, Angela; Hadzi-Pavlovic, Dusan | 2020           | Prolonged grief in refugees, parenting behaviour and children's mental health.                                                                                               | The Australian and New Zealand journal of psychiatry                                           |        | 9i6, 0111052 | 4867420967420 | <a href="https://dx.doi.org/10.1177/0004867420967420">https://dx.doi.org/10.1177/0004867420967420</a>               | Exclusion reason: Not along resettlement pathway; |

| Authors                                                                                                                                                                                                                     | Published Year | Title                                                                                                                                                                                               | Journal                                                                                                                                 | Volume | Issue        | Pages     | DOI                                                   | Notes                                                      |
|-----------------------------------------------------------------------------------------------------------------------------------------------------------------------------------------------------------------------------|----------------|-----------------------------------------------------------------------------------------------------------------------------------------------------------------------------------------------------|-----------------------------------------------------------------------------------------------------------------------------------------|--------|--------------|-----------|-------------------------------------------------------|------------------------------------------------------------|
| Bryant, Richard A; Edwards, Ben; Creamer, Mark; O'Donnell, Meaghan; Forbes, David; Felmingham, Kim L; Silove, Derrick; Steel, Zachary; Nickerson, Angela; McFarlane, Alexander C; Van Hooff, Miranda; Hadzi-Pavlovic, Dusan | 2018           | The effect of post-traumatic stress disorder on refugees' parenting and their children's mental health: a cohort study.                                                                             | The Lancet. Public health                                                                                                               | 3      | 5            | e249-e258 | <a href="https://dx.doi.org/">https://dx.doi.org/</a> | Exclusion reason: Not a screening program;                 |
| Buchmuller, Thimo; Lembcke, Hanna; Ialuna, Francesca; Busch, Julian; Leyendecker, Birgit                                                                                                                                    | 2020           | Mental Health Needs of Refugee Children in Specialized Early Education and Care Programs in Germany.                                                                                                | Journal of immigrant and minority health                                                                                                | 22     | 1            | 22-33     | <a href="https://dx.doi.org/">https://dx.doi.org/</a> | Exclusion reason: Not a screening program;                 |
| Buljan D.; Vrcek D.; Cekic-Arambasin A.; Karlovic D.; Zoricic Z.; Golik-Gruber V.                                                                                                                                           | 2002           | Posttraumatic stress disorder, alcohol dependence, and somatic disorders in displaced persons                                                                                                       | Alcoholism                                                                                                                              | 38     | 1-2          | 35-40     |                                                       | Exclusion reason: Not along resettlement pathway;          |
| Cantekin, Duygu; Gencoz, Tulin                                                                                                                                                                                              | 2017           | Mental health of Syrian asylum seekers in Turkey: The role of pre-migration and post-migration risk factors.                                                                                        | Journal of Social and Clinical Psychology                                                                                               | 36     | 10           | 835-859   | <a href="http://dx.doi.org/">http://dx.doi.org/</a>   | Exclusion reason: Full text unavailable;                   |
| Carlsson, Jessica M; Mortensen, Erik L; Kastrup, Marianne                                                                                                                                                                   | 2006           | Predictors of mental health and quality of life in male tortured refugees.                                                                                                                          | Nordic journal of psychiatry                                                                                                            | 60     | 1            | 51-7      |                                                       | Exclusion reason: Ineligible study design;                 |
| Carlsson, Jessica Mariana; Mortensen, Erik Lykke; Kastrup, Marianne                                                                                                                                                         | 2005           | A follow-up study of mental health and health-related quality of life in tortured refugees in multidisciplinary treatment.                                                                          | The Journal of nervous and mental disease                                                                                               | 193    | 10           | 651-7     |                                                       | Exclusion reason: Not along resettlement pathway;          |
| Cengiz I.; Ergun D.; Cakici E.                                                                                                                                                                                              | 2019           | Posttraumatic stress disorder, posttraumatic growth and psychological resilience in syrian refugees: Hatay, Turkey                                                                                  | Anadolu Psikiyatri Dergisi                                                                                                              | 20     | 3            | 269-276   | <a href="http://dx.doi.org/">http://dx.doi.org/</a>   | Exclusion reason: Not along resettlement pathway;          |
| Ceri, Veysi; Beser, Can; Perdahl Fis, Nese; Arman, Ayse                                                                                                                                                                     | 2018           | Findings from a specialized child psychiatry unit for care of refugee children in Istanbul.                                                                                                         | Klinik Psikiyatri Dergisi: The Journal of Clinical Psychiatry                                                                           | 21     | 2            | 113-121   | <a href="http://dx.doi.org/">http://dx.doi.org/</a>   | Exclusion reason: Not along resettlement pathway;          |
| Ceri, Veysi; Nasiroglu, Serhat; Ceri, Monika; Cetin, Fusun Cuhadaroglu                                                                                                                                                      | 2018           | Psychiatric morbidity among a school sample of Syrian refugee children in turkey: a cross-sectional, semistructured, standardized interview-based study.                                            | Journal of the American Academy of Child & Adolescent Psychiatry                                                                        | 57     | 9            | 696-698   | <a href="http://dx.doi.org/">http://dx.doi.org/</a>   | Exclusion reason: Not along resettlement pathway;          |
| Ceri, Veysi; Ozlu-Erkilic, Zeliha; Ozer, Urun; Yalcin, Murat; Popow, Christian; Akkaya-Kalayci, Turkan                                                                                                                      | 2016           | Psychiatric symptoms and disorders among Yazidi children and adolescents immediately after forced migration following ISIS attacks.                                                                 | Neuropsychiatrie : Klinik, Diagnostik, Therapie und Rehabilitation : Organ der Gesellschaft Österreichischer Nervenärzte und Psychiater | 30     | 3            | 145-150   |                                                       | Exclusion reason: Not along resettlement pathway           |
| Cha, Jiho; Surkan, Pamela J; Kim, Jaeshin; Yoon, Isabel A; Robinson, Courtland; Cardozo, Barbara Lopes; Lee, Hayoung                                                                                                        | 2018           | Human Rights as Political Determinants of Health: A Retrospective Study of North Korean Refugees.                                                                                                   | American journal of preventive medicine                                                                                                 | 55     | 2            | 271-279   | <a href="https://dx.doi.org/">https://dx.doi.org/</a> | Exclusion reason: Not along resettlement pathway;          |
| Chaaya, M; Sibai, A M; Fayad, R; El-Roueiheb, Z                                                                                                                                                                             | 2007           | Religiosity and depression in older people: evidence from underprivileged refugee and non-refugee communities in Lebanon.                                                                           | Aging & mental health                                                                                                                   | 11     | 1            | 37-44     |                                                       | Exclusion reason: Not along resettlement pathway;          |
| Chang A.; Scherb H.; Causevic S.                                                                                                                                                                                            | 2016           | Analysis of refugee mental health screening and referral processes at the newcomers health program, San Francisco general hospital's refugee medical clinic: A quality improvement study            | Annals of Global Health                                                                                                                 | 82     | 3            | 409       |                                                       | Exclusion reason: Ineligible study design;                 |
| Charney, Meredith E; Keane, Terence M                                                                                                                                                                                       | 2007           | Psychometric analyses of the Clinician-Administered PTSD Scale (CAPS)–Bosnian translation.                                                                                                          | Cultural diversity & ethnic minority psychology                                                                                         | 13     | 2            | 161-168   | <a href="https://dx.doi.org/">https://dx.doi.org/</a> | Exclusion reason: Not along resettlement pathway;          |
| Chaves, Nadia J; Paxton, Georgia A; Biggs, Beverley-Ann; Thambiran, Aesen; Gardiner, Joanne; Williams, Jan; Smith, Mitchell M; Davis, Joshua S                                                                              | 2017           | The Australasian Society for Infectious Diseases and Refugee Health Network of Australia recommendations for health assessment for people from refugee-like backgrounds: an abridged outline.       | The Medical journal of Australia                                                                                                        | 206    | 7            | 310-315   |                                                       | Exclusion reason: Ineligible study design;                 |
| Chernet A.; Probst-Hensch N.; Sydow V.; Paris D.H.; Labhardt N.D.                                                                                                                                                           | 2019           | Mental health and resilience, on and post arrival among eritrean refugees in Switzerland: A mental health and resilience, on and post arrival among eritrean refugees in Switzerland-a cohort study | Transactions of the Royal Society of Tropical Medicine and Hygiene                                                                      | 113    | Supplement 1 | S290      | <a href="http://dx.doi.org/">http://dx.doi.org/</a>   | Exclusion reason: Full text unavailable;                   |
| Cheung Chung, Man; AlQarni, Nowf; AlMazrouei, Mariam; Al Muhairi, Shamsa; Shakra, Mudar; Mitchell, Britt; Al Mazrouei, Sara; Al Hashimi, Shurooq                                                                            | 2018           | The impact of trauma exposure characteristics on post-traumatic stress disorder and psychiatric co-morbidity among Syrian refugees.                                                                 | Psychiatry research                                                                                                                     | 259    | qc4, 7911385 | 310-315   | <a href="https://dx.doi.org/">https://dx.doi.org/</a> | Exclusion reason: Not along resettlement pathway;          |
| Cleveland, Janet; Rousseau, Cecile                                                                                                                                                                                          | 2013           | Psychiatric symptoms associated with brief detention of adult asylum seekers in Canada.                                                                                                             | Canadian journal of psychiatry. Revue canadienne de psychiatrie                                                                         | 58     | 7            | 409-16    |                                                       | Exclusion reason: Not a screening program;                 |
| Coyle R.; Bowen S.; Mullin S.; Sayer N.; Siggers G.; Bennett S.                                                                                                                                                             | 2016           | Physical and mental health needs of unaccompanied children seeking asylum: A descriptive analysis in Kent, UK                                                                                       | The Lancet                                                                                                                              | 388    | SPEC.ISS 1   | 40        |                                                       | Exclusion reason: Full text unavailable;                   |
| Crawshaw, A F; Kirkbride, H                                                                                                                                                                                                 | 2018           | Public Health England's Migrant Health Guide: an online resource for primary care practitioners.                                                                                                    | Public health                                                                                                                           | 158    | qi7, 0376507 | 198-202   | <a href="https://dx.doi.org/">https://dx.doi.org/</a> | Exclusion reason: Population is not refugee/asylum seeker; |

| Authors                                                                                                                                                               | Published Year | Title                                                                                                                                                                                | Journal                                                                                    | Volume | Issue        | Pages     | DOI                                                   | Notes                                                                         |
|-----------------------------------------------------------------------------------------------------------------------------------------------------------------------|----------------|--------------------------------------------------------------------------------------------------------------------------------------------------------------------------------------|--------------------------------------------------------------------------------------------|--------|--------------|-----------|-------------------------------------------------------|-------------------------------------------------------------------------------|
| Crepet, Anna; Rita, Francesco; Reid, Anthony; Van den Boogaard, Wilma; Deiana, Pina; Quaranta, Gaia; Barbieri, Aurelia; Bongiorno, Francesco; Di Carlo, Stefano       | 2017           | Mental health and trauma in asylum seekers landing in Sicily in 2015: a descriptive study of neglected invisible wounds.                                                             | Conflict and health                                                                        | 11     | 101286573    | 1         | <a href="https://dx.doi.org/">https://dx.doi.org/</a> | Exclusion reason: Ineligible study design;                                    |
| Cusack, Karen Jean                                                                                                                                                    | 2002           | Refugee experiences of trauma and PTSD; Effects on psychological, physical, and financial well-being.                                                                                | Dissertation Abstracts International: Section B: The Sciences and Engineering              | 62     | 10-B         | 4778      |                                                       | Exclusion reason: Ineligible study design;                                    |
| D'Avanzo, C E; Barab, S A                                                                                                                                             | 1998           | Depression and anxiety among Cambodian refugee women in France and the United States.                                                                                                | Issues in mental health nursing                                                            | 19     | 6            | 541-56    |                                                       | Exclusion reason: Not along resettlement pathway;                             |
| D'Souza R.F.                                                                                                                                                          | 2011           | The mental health consequences of protracted asylum seeking in Australia                                                                                                             | European Psychiatry                                                                        | 26     | SUPPL. 1     |           | <a href="http://dx.doi.org/">http://dx.doi.org/</a>   | Exclusion reason: Full text unavailable;                                      |
| Dao, Tam K; Poritz, Julia M P; Moody, Rachel P; Szeto, Kim                                                                                                            | 2012           | Development, reliability, and validity of the Posttraumatic Stress Disorder Interview for Vietnamese refugees: a diagnostic instrument for Vietnamese refugees.                      | Journal of traumatic stress                                                                | 25     | 4            | 440-5     | <a href="https://dx.doi.org/">https://dx.doi.org/</a> | Exclusion reason: Not along resettlement pathway;                             |
| Davey, Carine; Heard, Robert; Lennings, Chris                                                                                                                         | 2015           | Development of the Arabic versions of the Impact of Events Scale-Revised and the Posttraumatic Growth Inventory to assess trauma and growth in Middle Eastern refugees in Australia. | Clinical Psychologist                                                                      | 19     | 3            | 131-139   | <a href="http://dx.doi.org/">http://dx.doi.org/</a>   | Exclusion reason: Not a screening program;                                    |
| Davidson, N; Skull, S; Chaney, G; Frydenberg, A; Jones, Cheryl; Isaacs, D; Kelly, P; Lampropoulos, B; Raman, S; Silove, D; Buttery, J; Smith, M; Steel, Z; Burgner, D | 2004           | Comprehensive health assessment for newly arrived refugee children in Australia.                                                                                                     | Journal of paediatrics and child health                                                    | 40     | 9-10         | 562-8     |                                                       | Exclusion reason: Ineligible study design;                                    |
| Davis, Rebecca Meghan; Davis, Henry 4th                                                                                                                               | 2006           | PTSD symptom changes in refugees.                                                                                                                                                    | Torture : quarterly journal on rehabilitation of torture victims and prevention of torture | 16     | 1            | 10-9      |                                                       | Exclusion reason: Full text unavailable;                                      |
| De Andrade, Yaya Maria                                                                                                                                                | 1995           | Psychosocial trauma: Dialogues with emigre children from El Salvador.                                                                                                                | Dissertation Abstracts International: Section B: The Sciences and Engineering              | 56     | 5-B          | 2859      |                                                       | Exclusion reason: Not along resettlement pathway;                             |
| de Fouchier, Capucine; Blanchet, Alain; Hopkins, William; Bui, Eric; Ait-Aoudia, Malik; Jehel, Louis                                                                  | 2012           | Validation of a French adaptation of the Harvard Trauma Questionnaire among torture survivors from sub-Saharan African countries.                                                    | European journal of psychotraumatology                                                     | 3      | 101559025    |           | <a href="https://dx.doi.org/">https://dx.doi.org/</a> | Exclusion reason: Screening program administered post 12months of settlement; |
| de Jong, J P; Scholte, W F; Koeter, M W; Hart, A A                                                                                                                    | 2000           | The prevalence of mental health problems in Rwandan and Burundese refugee camps.                                                                                                     | Acta psychiatrica Scandinavica                                                             | 102    | 3            | 171-7     |                                                       | Exclusion reason: Not along resettlement pathway;                             |
| De Vries, J                                                                                                                                                           | 2001           | Mental health issues in Tamil refugees and displaced persons. Counselling implications.                                                                                              | Patient education and counseling                                                           | 42     | 1            | 15-24     |                                                       | Exclusion reason: Not along resettlement pathway;                             |
| Devins, G M; Beiser, M; Dion, R; Pelletier, L G; Edwards, R G                                                                                                         | 1997           | Cross-cultural measurements of psychological well-being: the psychometric equivalence of Cantonese, Vietnamese, and Laotian translations of the Affect Balance Scale.                | American journal of public health                                                          | 87     | 5            | 794-9     |                                                       | Exclusion reason: Not along resettlement pathway;                             |
| Dietrich, Hans; Al Ali, Radwan; Tagay, Sefik; Hebebrand, Johannes; Reissner, Volker                                                                                   | 2019           | Screening for posttraumatic stress disorder in young adult refugees from Syria and Iraq.                                                                                             | Comprehensive psychiatry                                                                   | 90     | do9, 0372612 | 73-81     | <a href="https://dx.doi.org/">https://dx.doi.org/</a> | Exclusion reason: Ineligible study design;                                    |
| Dixius, Andrea; Mohler, Eva                                                                                                                                           | 2017           | A new therapy concept validating the special needs of refugee children and adolescents: START-Stress-Traumasympptoms-Arousal-Regulation-Treatment.                                   | Psychotherapie Forum                                                                       | 22     | 3            | 76-85     | <a href="http://dx.doi.org/">http://dx.doi.org/</a>   | Exclusion reason: Full text unavailable;                                      |
| Doolan, Emma L; Bryant, Richard A; Liddell, Belinda J; Nickerson, Angela                                                                                              | 2017           | The conceptualization of emotion regulation difficulties, and its association with posttraumatic stress symptoms in traumatized refugees.                                            | Journal of anxiety disorders                                                               | 50     | co1, 8710131 | 7-14      | <a href="https://dx.doi.org/">https://dx.doi.org/</a> | Exclusion reason: Not along resettlement pathway;                             |
| Elklit, Ask; Norregard, Jette; Tibor, Birgitte                                                                                                                        | 1997           | Trauma among young Bosnian refugees in Denmark.                                                                                                                                      | Psykologisk Paedagogisk Radvivning                                                         | 34     | 1            | 3-18      |                                                       | Exclusion reason: Full text unavailable;                                      |
| Elklit, Ask; Ostergard Kjaer, Kamilla; Lasgaard, Mathias; Palic, Sabina                                                                                               | 2012           | Social support, coping and posttraumatic stress symptoms in young refugees.                                                                                                          | Torture : quarterly journal on rehabilitation of torture victims and prevention of torture | 22     | 1            | 11-23     |                                                       | Exclusion reason: Ineligible study design;                                    |
| Ellis, B Heidi; Lhewa, Dechen; Charney, Meredith; Cabral, Howard                                                                                                      | 2006           | Screening for PTSD among Somali adolescent refugees: psychometric properties of the UCLA PTSD Index.                                                                                 | Journal of traumatic stress                                                                | 19     | 4            | 547-51    |                                                       | Exclusion reason: Not along resettlement pathway;                             |
| Ephraim, David                                                                                                                                                        | 2002           | Rorschach trauma assessment of survivors of torture and state violence.                                                                                                              | Rorschachiana                                                                              | 25     | 1            | 58-76     | <a href="http://dx.doi.org/">http://dx.doi.org/</a>   | Exclusion reason: Not a screening program;                                    |
| Euteneuer, Frank; Schafer, Sarina J                                                                                                                                   | 2018           | Brief Report: Subjective Social Mobility and Depressive Symptoms in Syrian Refugees to Germany.                                                                                      | Journal of immigrant and minority health                                                   | 20     | 6            | 1533-1536 | <a href="https://dx.doi.org/">https://dx.doi.org/</a> | Exclusion reason: Not a screening program;                                    |
| Eytan, Ariel; Durieux-Paillard, Sophie; Whitaker-Clinch, Barbara; Loutan, Louis; Bovier, Patrick A                                                                    | 2007           | Transcultural validity of a structured diagnostic interview to screen for major depression and posttraumatic stress disorder among refugees.                                         | The Journal of nervous and mental disease                                                  | 195    | 9            | 723-8     |                                                       | Exclusion reason: Duplicate;                                                  |
| Fawzi, M C; Pham, T; Lin, L; Nguyen, T V; Ngo, D; Murphy, E; Mollica, R F                                                                                             | 1997           | The validity of posttraumatic stress disorder among Vietnamese refugees.                                                                                                             | Journal of traumatic stress                                                                | 10     | 1            | 101-8     |                                                       | Exclusion reason: Not a screening program;                                    |

| Authors                                                                                                                                          | Published Year | Title                                                                                                                                                           | Journal                                                                                                           | Volume | Issue        | Pages        | DOI                                                   | Notes                                                      |
|--------------------------------------------------------------------------------------------------------------------------------------------------|----------------|-----------------------------------------------------------------------------------------------------------------------------------------------------------------|-------------------------------------------------------------------------------------------------------------------|--------|--------------|--------------|-------------------------------------------------------|------------------------------------------------------------|
| Fellmeth, Gracia; Plugge, Emma; Fazel, Mina; Charunwattana, Prakaykaew; Nosten, Francois; Fitzpatrick, Raymond; Simpson, Julie A; McGready, Rose | 2018           | Validation of the Refugee Health Screener-15 for the assessment of perinatal depression among Karen and Burmese women on the Thai-Myanmar border.               | PloS one                                                                                                          | 13     | 5            | e0197403     | <a href="https://dx.doi.org/">https://dx.doi.org/</a> | Exclusion reason: Population is not refugee/asylum seeker; |
| Fox, Samara D; Griffin, Randi H; Pachankis, John E                                                                                               | 2020           | Minority stress, social integration, and the mental health needs of LGBTQ asylum seekers in North America.                                                      | Social science & medicine (1982)                                                                                  | 246    | ut9, 8303205 | 112727       | <a href="https://dx.doi.org/">https://dx.doi.org/</a> | Exclusion reason: Not along resettlement pathway;          |
| Francis J.; Mutch R.C.; Rutherford D. M.; Cherian S.                                                                                             | 2012           | Universal paediatric refugee health screening                                                                                                                   | Journal of Paediatrics and Child Health                                                                           | 48     | 11           | 1048-1049    | <a href="http://dx.doi.org/">http://dx.doi.org/</a>   | Exclusion reason: Not a screening program;                 |
| Gabel U.; Ruf M.; Schauer M.; Odenwald M.; Neuner F.                                                                                             | 2006           | Prevalence of posttraumatic stress disorder among asylum seekers in Germany and its detection in the application process for asylum                             | Zeitschrift fur Klinische Psychologie und Psychotherapie                                                          | 35     | 1            | 12-20        | <a href="http://dx.doi.org/">http://dx.doi.org/</a>   | Exclusion reason: Full text unavailable;                   |
| Gadeberg, Anne Kristine; Norredam, Marie                                                                                                         | 2016           | Urgent need for validated trauma and mental health screening tools for refugee children and youth.                                                              | European child & adolescent psychiatry                                                                            | 25     | 8            | 929-31       | <a href="https://dx.doi.org/">https://dx.doi.org/</a> | Exclusion reason: Ineligible study design;                 |
| Gandham S.; Gunasekera H.; Isaacs D.; Maycock A.; Britton P.N.                                                                                   | 2017           | High prevalence of symptoms of post-traumatic stress in children of refugee and asylum seeker backgrounds                                                       | Journal of Paediatrics and Child Health                                                                           | 53     | Supplement 3 | 16           | <a href="http://dx.doi.org/">http://dx.doi.org/</a>   | Exclusion reason: Full text unavailable;                   |
| Georgiadou, Ekaterini; Morawa, Eva; Erim, Yesim                                                                                                  | 2017           | High Manifestations of Mental Distress in Arabic Asylum Seekers Accommodated in Collective Centers for Refugees in Germany.                                     | International journal of environmental research and public health                                                 | 14     | 6            |              | <a href="https://dx.doi.org/">https://dx.doi.org/</a> | Exclusion reason: Not a screening program;                 |
| Gerritsen, Annette A M; Bramsen, Inge; Deville, Walter; van Willigen, Loes H M; Hovens, Johannes E; van der Ploeg, Henk M                        | 2006           | Physical and mental health of Afghan, Iranian and Somali asylum seekers and refugees living in the Netherlands.                                                 | Social psychiatry and psychiatric epidemiology                                                                    | 41     | 1            | 18-26        |                                                       | Exclusion reason: Not a screening program;                 |
| Gerritsen, Annette A M; Bramsen, Inge; Deville, Walter; van Willigen, Loes H M; Hovens, Johannes E; van der Ploeg, Henk M                        | 2004           | Health and health care utilisation among asylum seekers and refugees in the Netherlands: design of a study.                                                     | BMC public health                                                                                                 | 4      | 100968562    | 7            |                                                       | Exclusion reason: Ineligible study design;                 |
| Getnet, Berhanie; Alem, Atalay                                                                                                                   | 2019           | Validity of the Center for Epidemiologic Studies Depression Scale (CES-D) in Eritrean refugees living in Ethiopia.                                              | BMJ open                                                                                                          | 9      | 5            | e026129      | <a href="https://dx.doi.org/">https://dx.doi.org/</a> | Exclusion reason: Not along resettlement pathway;          |
| Ghazinour, Mehdi; Richter, Jorg; Eisemann, Martin                                                                                                | 2004           | Quality of life among Iranian refugees resettled in Sweden.                                                                                                     | Journal of immigrant health                                                                                       | 6      | 2            | 71-81        |                                                       | Exclusion reason: Not along resettlement pathway;          |
| Goodman, Laura F; Jensen, Guy W; Galante, Joseph M; Farmer, Diana L; Tache, Stephanie                                                            | 2018           | A cross-sectional investigation of the health needs of asylum seekers in a refugee clinic in Germany.                                                           | BMC family practice                                                                                               | 19     | 1            | 64           | <a href="https://dx.doi.org/">https://dx.doi.org/</a> | Exclusion reason: Ineligible study design;                 |
| Goodwin, Robin; Takahashi, Masahito; Sun, Shaojing; Ben-Ezra, Menachem                                                                           | 2015           | Psychological distress among tsunami refugees from the Great East Japan earthquake.                                                                             | BJPsych open                                                                                                      | 1      | 1            | 92-97        |                                                       | Exclusion reason: Ineligible study design;                 |
| Gottlieb, Nora; Puschmann, Conny; Stenzinger, Fabian; Koelber, Julia; Rasch, Laurette; Koppelow, Martha; Al Munjid, Razan                        | 2020           | Health and Healthcare Utilization among Asylum-Seekers from Berlin's LGBTIQ Shelter: Preliminary Results of a Survey.                                           | International journal of environmental research and public health                                                 | 17     | 12           |              | <a href="https://dx.doi.org/">https://dx.doi.org/</a> | Exclusion reason: Ineligible study design;                 |
| Gottvall, Maria; Sjolund, Sara; Arwidson, Charlotta; Saboonchi, Fredrik                                                                          | 2019           | Health-related quality of life among syrian refugees resettled in sweden.                                                                                       | Quality of Life Research: An International Journal of Quality of Life Aspects of Treatment, Care & Rehabilitation |        |              | No-Specified | <a href="http://dx.doi.org/">http://dx.doi.org/</a>   | Exclusion reason: Ineligible study design;                 |
| Green, Aliza S; Ruchman, Samuel G; Katz, Craig L; Singer, Elizabeth K                                                                            | 2020           | Piloting forensic tele-mental health evaluations of asylum seekers.                                                                                             | Psychiatry research                                                                                               | 291    | qc4, 7911385 | 113256       | <a href="https://dx.doi.org/">https://dx.doi.org/</a> | Exclusion reason: Ineligible study design;                 |
| Gulden, Ashley; Westermeyer, Joseph; Lien, Rebecca; Spring, Marline; Johnson, David; Butcher, James; Jaranson, James                             | 2010           | HADStress screen for posttraumatic stress: replication in ethiopian refugees.                                                                                   | The Journal of nervous and mental disease                                                                         | 198    | 10           | 762-7        | <a href="https://dx.doi.org/">https://dx.doi.org/</a> | Exclusion reason: Not along resettlement pathway;          |
| Haith-Cooper, Melanie; Waskett, Catherine; Montague, Jane; Horne, Maria                                                                          | 2018           | Exercise and physical activity in asylum seekers in Northern England; using the theoretical domains framework to identify barriers and facilitators.            | BMC public health                                                                                                 | 18     | 1            | 762          | <a href="https://dx.doi.org/">https://dx.doi.org/</a> | Exclusion reason: No mental health screening;              |
| Hamdan-Mansour, Ayman M; Abdel Razeq, Nadin M; AbdullHaq, Bayan; Arabiat, Diana; Khalil, Amari A                                                 | 2017           | Displaced Syrian children's reported physical and mental wellbeing.                                                                                             | Child and adolescent mental health                                                                                | 22     | 4            | 186-193      | <a href="https://dx.doi.org/">https://dx.doi.org/</a> | Exclusion reason: Ineligible study design;                 |
| Hamrah, Mohammad Shoaib; Hoang, Ha; Mond, Jonathan; Pahlavanzade, Bagher; Charkazi, Abdurrahman; Auckland, Stuart                                | 2020           | The prevalence and correlates of symptoms of post-traumatic stress disorder (PTSD) among resettled Afghan refugees in a regional area of Australia.             | Journal of mental health (Abingdon, England)                                                                      |        | 9212352      | 1-7          | <a href="https://dx.doi.org/">https://dx.doi.org/</a> | Exclusion reason: Not along resettlement pathway;          |
| Hebebrand, Johannes; Anagnostopoulos, Dimitris; Eliez, Stephan; Linse, Henk; Pejovic-Milovancevic, Milica; Klasen, Henrikje                      | 2016           | A first assessment of the needs of young refugees arriving in Europe: what mental health professionals need to know.                                            | European child & adolescent psychiatry                                                                            | 25     | 1            | 1-6          | <a href="https://dx.doi.org/">https://dx.doi.org/</a> | Exclusion reason: Ineligible study design;                 |
| Hecker, Tobias; Huber, Stephanie; Maier, Thomas; Maercker, Andreas                                                                               | 2018           | Differential Associations Among PTSD and Complex PTSD Symptoms and Traumatic Experiences and Postmigration Difficulties in a Culturally Diverse Refugee Sample. | Journal of traumatic stress                                                                                       | 31     | 6            | 795-804      | <a href="https://dx.doi.org/">https://dx.doi.org/</a> | Exclusion reason: Not along resettlement pathway;          |



| Authors                                                                                                                                                                        | Published Year | Title                                                                                                                                                                                           | Journal                                                        | Volume             | Issue        | Pages   | DOI                                                   | Notes                                                                         |
|--------------------------------------------------------------------------------------------------------------------------------------------------------------------------------|----------------|-------------------------------------------------------------------------------------------------------------------------------------------------------------------------------------------------|----------------------------------------------------------------|--------------------|--------------|---------|-------------------------------------------------------|-------------------------------------------------------------------------------|
| Heeren, Martina; Wittmann, Lutz; Ehler, Ulrike; Schnyder, Ulrich; Maier, Thomas; Muller, Julia                                                                                 | 2014           | Psychopathology and resident status - comparing asylum seekers, refugees, illegal migrants, labor migrants, and residents.                                                                      | Comprehensive psychiatry                                       | 55                 | 4            | 818-25  | <a href="https://dx.doi.org/">https://dx.doi.org/</a> | Exclusion reason: Not along resettlement pathway;                             |
| Hengst, Sophie M C; Smid, Geert E; Laban, Cornelis J                                                                                                                           | 2018           | The Effects of Traumatic and Multiple Loss on Psychopathology, Disability, and Quality of Life in Iraqi Asylum Seekers in the Netherlands.                                                      | The Journal of nervous and mental disease                      | 206                | 1            | 52-60   | <a href="https://dx.doi.org/">https://dx.doi.org/</a> | Exclusion reason: Not along resettlement pathway;                             |
| Hermansson A.-C.; Timpka T.                                                                                                                                                    | 1999           | How do you feel?: A self-rating scale for measuring well-being in refugees                                                                                                                      | Transcultural Psychiatry                                       | 36                 | 3            | 317-328 | <a href="http://dx.doi.org/">http://dx.doi.org/</a>   | Exclusion reason: Not along resettlement pathway;                             |
| Hermansson, Ann-Charlotte; Timpka, Toomas; Thyberg, Mikael                                                                                                                     | 2003           | The long-term impact of torture on the mental health of war-wounded refugees: findings and implications for nursing programmes.                                                                 | Scandinavian journal of caring sciences                        | 17                 | 4            | 317-24  |                                                       | Exclusion reason: Ineligible study design;                                    |
| Hewlett, Montana; Merry, Lisa; Mishra, Anit; Islam, Risatul; Wali, Raz Mohammad; Gagnon, Anita                                                                                 | 2015           | Alcohol use among Bhutanese refugees in Nepal.                                                                                                                                                  | International Journal of Migration, Health & Social Care       | 11                 | 3            | 158-168 | 10.1108/IJMHS                                         | Exclusion reason: Not along resettlement pathway;                             |
| Hinton D.E.; Sinclair S.J.; Chung R.C.-Y.; Pollack M.H.                                                                                                                        | 2007           | The SF-36 among Cambodian and Vietnamese refugees: An examination of psychometric properties                                                                                                    | Journal of Psychopathology and Behavioral Assessment           | 29                 | 1            | 39-46   | <a href="http://dx.doi.org/">http://dx.doi.org/</a>   | Exclusion reason: Not along resettlement pathway;                             |
| Hinton, Devon E; Chhean, Dara; Pich, Vuth; Pollack, M H; Orr, Scott P; Pitman, Roger K                                                                                         | 2006           | Assessment of posttraumatic stress disorder in Cambodian refugees using the Clinician-Administered PTSD Scale: psychometric properties and symptom severity.                                    | Journal of traumatic stress                                    | 19                 | 3            | 405-9   |                                                       | Exclusion reason: Not along resettlement pathway;                             |
| Hinton, Devon E; Kredlow, M Alexandra; Pich, Vuth; Bui, Eric; Hofmann, Stefan G                                                                                                | 2013           | The relationship of PTSD to key somatic complaints and cultural syndromes among Cambodian refugees attending a psychiatric clinic: the Cambodian Somatic Symptom and Syndrome Inventory (CSSI). | Transcultural psychiatry                                       | 50                 | 3            | 347-70  | <a href="https://dx.doi.org/">https://dx.doi.org/</a> | Exclusion reason: Not a screening program;                                    |
| Hinton, Devon E; Pich, Vuth; Safren, Steven A; Pollack, Mark H; McNally, Richard J                                                                                             | 2005           | Anxiety sensitivity in traumatized Cambodian refugees: a discriminant function and factor analytic investigation.                                                                               | Behaviour research and therapy                                 | 43                 | 12           | 1631-43 |                                                       | Exclusion reason: Not along resettlement pathway;                             |
| Hinton, Devon E; Reis, Ria; de Jong, Joop                                                                                                                                      | 2015           | The "Thinking a Lot" Idiom of Distress and PTSD: An Examination of Their Relationship among Traumatized Cambodian Refugees Using the "Thinking a Lot" Questionnaire.                            | Medical anthropology quarterly                                 | 29                 | 3            | 357-80  | <a href="https://dx.doi.org/">https://dx.doi.org/</a> | Exclusion reason: Not along resettlement pathway;                             |
| Hinton, W L; Tiet, Q; Tran, C G; Chesney, M                                                                                                                                    | 1997           | Predictors of depression among refugees from Vietnam: a longitudinal study of new arrivals.                                                                                                     | The Journal of nervous and mental disease                      | 185                | 1            | 39-45   |                                                       | Exclusion reason: Ineligible study design;                                    |
| Hocking, Debbie C; Kennedy, Gerard A; Sundram, Suresh                                                                                                                          | 2015           | Mental disorders in asylum seekers: the role of the refugee determination process and employment.                                                                                               | The Journal of nervous and mental disease                      | 203                | 1            | 28-32   | <a href="https://dx.doi.org/">https://dx.doi.org/</a> | Exclusion reason: Ineligible study design;                                    |
| Hoffmann, Christopher; McFarland, Benton H; Kinzie, J David; Bresler, Larissa; Rakhlin, Dmitriy; Wolf, Solomon; Kovas, Anne E                                                  | 2005           | Psychometric properties of a Russian version of the SF-12 Health Survey in a refugee population.                                                                                                | Comprehensive psychiatry                                       | 46                 | 5            | 390-7   |                                                       | Exclusion reason: Not along resettlement pathway;                             |
| Hollifield, Michael; Eckert, Valerie; Warner, Teddy D; Jenkins, Janis; Krakow, Barry; Ruiz, James; Westermeyer, Joseph                                                         | 2005           | Development of an inventory for measuring war-related events in refugees.                                                                                                                       | Comprehensive psychiatry                                       | 46                 | 1            | 67-80   |                                                       | Exclusion reason: Not along resettlement pathway;                             |
| Hollifield, Michael; Warner, Teddy D; Krakow, Barry; Jenkins, Janis; Westermeyer, Joseph                                                                                       | 2009           | The range of symptoms in refugees of war: the New Mexico Refugee Symptom Checklist-121.                                                                                                         | The Journal of nervous and mental disease                      | 197                | 2            | 117-25  | <a href="https://dx.doi.org/">https://dx.doi.org/</a> | Exclusion reason: Screening program administered post 12months of settlement; |
| Hossain M.; Pearson R.; McAlpine A.; Bacchus L.; Muuo S.W.; Muthuri S.K.; Spangaro J.; Kuper H.; Franchi G.; Cordero R.P.; Cornish-Spencer S.; Hess T.; Bangha M.; Izugbara C. | 2020           | Disability, violence, and mental health among Somali refugee women in a humanitarian setting                                                                                                    | Global Mental Health                                           | 7 (Hossain, McAlpi |              | e30     | <a href="http://dx.doi.org/">http://dx.doi.org/</a>   | Exclusion reason: Ineligible study design;                                    |
| Hussain, Dilwar; Bhushan, Braj                                                                                                                                                 | 2009           | Development and validation of the Refugee Trauma Experience Inventory.                                                                                                                          | Psychological Trauma: Theory, Research, Practice, and Policy   | 1                  | 2            | 107-117 | <a href="http://dx.doi.org/">http://dx.doi.org/</a>   | Exclusion reason: Screening program administered post 12months of settlement; |
| Hvidtfeldt, Camilla; Petersen, Jorgen Holm; Norredam, Marie                                                                                                                    | 2020           | Prolonged periods of waiting for an asylum decision and the risk of psychiatric diagnoses: a 22-year longitudinal cohort study from Denmark.                                                    | International journal of epidemiology                          | 49                 | 2            | 400-409 | <a href="https://dx.doi.org/">https://dx.doi.org/</a> | Exclusion reason: Not a screening program;                                    |
| Hyland, P; Ceann, R; Daccache, F; Abou Daher, R; Sleiman, J; Gilmore, B; Byrne, S; Shevlin, M; Murphy, J; Vallieres, F                                                         | 2018           | Are posttraumatic stress disorder (PTSD) and complex-PTSD distinguishable within a treatment-seeking sample of Syrian refugees living in Lebanon?.                                              | Global mental health (Cambridge, England)                      | 5                  | 101659641    | e14     | <a href="https://dx.doi.org/">https://dx.doi.org/</a> | Exclusion reason: Not along resettlement pathway;                             |
| Ing, Harriet; Fellmeth, Gracia; White, Jittrachote; Stein, Alan; Simpson, Julie A; McGready, Rose                                                                              | 2017           | Validation of the Edinburgh Postnatal Depression Scale (EPDS) on the Thai-Myanmar border.                                                                                                       | Tropical doctor                                                | 47                 | 4            | 339-347 | <a href="https://dx.doi.org/">https://dx.doi.org/</a> | Exclusion reason: Not along resettlement pathway;                             |
| Islam L.; Lamberti R.; Bardino M.; Grijuela B.; Matarazzo E.; Rizzo Y.; Ranieri R.                                                                                             | 2018           | Trauma, migration and mental health in a sample of asylum-seeking women in Italy                                                                                                                | European Psychiatry                                            | 48                 | Supplement 1 | S453    | <a href="http://dx.doi.org/">http://dx.doi.org/</a>   | Exclusion reason: Full text unavailable;                                      |
| Jakobsen, Marianne; Demott, Melinda A M; Heir, Trond                                                                                                                           | 2014           | Prevalence of psychiatric disorders among unaccompanied asylum-seeking adolescents in norway.                                                                                                   | Clinical practice and epidemiology in mental health : CP & EMH | 10                 | 101245735    | 53-8    | <a href="https://dx.doi.org/">https://dx.doi.org/</a> | Exclusion reason: Ineligible study design;                                    |

| Authors                                                                                                                                                                                                   | Published Year | Title                                                                                                                                      | Journal                                                           | Volume | Issue                             | Pages          | DOI                                                   | Notes                                                      |
|-----------------------------------------------------------------------------------------------------------------------------------------------------------------------------------------------------------|----------------|--------------------------------------------------------------------------------------------------------------------------------------------|-------------------------------------------------------------------|--------|-----------------------------------|----------------|-------------------------------------------------------|------------------------------------------------------------|
| Javanbakht, Arash; Grasser, Lana Ruvolo; Kim, Soyeong; Arken, Cynthia L; Nugent, Nicole                                                                                                                   | 2020           | Perceived health, adversity, and posttraumatic stress disorder in Syrian and Iraqi refugees.                                               | The International journal of social psychiatry                    |        | gt5, 0374726                      | 20764020978274 | <a href="https://dx.doi.org/">https://dx.doi.org/</a> | Exclusion reason: Ineligible study design;                 |
| Jensen, Natasja Koitzsch; Norredam, Marie; Priebe, Stefan; Krasnik, Allan                                                                                                                                 | 2013           | How do general practitioners experience providing care to refugees with mental health problems? A qualitative study from Denmark.          | BMC family practice                                               | 14     | 100967792                         | 17             | <a href="https://dx.doi.org/">https://dx.doi.org/</a> | Exclusion reason: Population is not refugee/asylum seeker; |
| Jensen, Tine K; Fjermestad, Krister W; Granly, Lene; Wilhelmsen, Nicolai H                                                                                                                                | 2015           | Stressful life experiences and mental health problems among unaccompanied asylum-seeking children.                                         | Clinical child psychology and psychiatry                          | 20     | 1                                 | 106-16         | <a href="https://dx.doi.org/">https://dx.doi.org/</a> | Exclusion reason: Not a screening program;                 |
| Jensen, Tine K; Skar, Ane-Marthe Solheim; Andersson, Elin Sofia; Birkeland, Marianne Skogbrott                                                                                                            | 2019           | Long-term mental health in unaccompanied refugee minors: pre- and post-flight predictors.                                                  | European child & adolescent psychiatry                            | 28     | 12                                | 1671-1682      | <a href="https://dx.doi.org/">https://dx.doi.org/</a> | Exclusion reason: Ineligible study design;                 |
| Jeon, Woo-Teak; Yu, Shi-Eun; Cho, Young-A; Eom, Jin-Sup                                                                                                                                                   | 2008           | Traumatic experiences and mental health of north korean refugees in South Korea.                                                           | Psychiatry investigation                                          | 5      | 4                                 | 213-20         | <a href="https://dx.doi.org/">https://dx.doi.org/</a> | Exclusion reason: Not a screening program;                 |
| Jeremie B.; Anne-Emmanuelle A.; Martine M.; Florence F.; Javier S.; Alejandro R.-U.; Bernard H.; Mario G.; Patrick B.                                                                                     | 2017           | Assessing the plight of young unaccompanied refugees                                                                                       | Swiss Medical Weekly                                              | 147    | 47-48                             | w14547         | <a href="http://dx.doi.org/">http://dx.doi.org/</a>   | Exclusion reason: Not a screening program;                 |
| Joshua P.; Koh A.; Woodland L.; Zwi K.                                                                                                                                                                    | 2010           | Refugee child health screening in the illawarra: A comprehensive population screening program                                              | Journal of Paediatrics and Child Health                           | 46     | SUPPL. 2                          | 8              | <a href="http://dx.doi.org/">http://dx.doi.org/</a>   | Exclusion reason: Full text unavailable;                   |
| Kaiser, B. N; Ticao, C; Anoje, C; Minto, J; Boglosa, J; Kohrt, B. A                                                                                                                                       | 2019           | Adapting culturally appropriate mental health screening tools for use among conflict-affected and other vulnerable adolescents in Nigeria. | Global Mental Health                                              | 6      | Health Psychology & Medicine [33] |                | <a href="http://dx.doi.org/">http://dx.doi.org/</a>   | Exclusion reason: Population is not refugee/asylum seeker; |
| Kaur, Kushlpal; Sulaiman, Ahmad Hatim; Yoon, Chee Kok; Hashim, Ali Hanim; Kaur, Manveen; Hui, Koh Ong; Sabki, Zuraidda Ahmad; Francis, Benedict; Singh, Sarbhan; Gill, Jesjeet Singh                      | 2020           | Elucidating Mental Health Disorders among Rohingya Refugees: A Malaysian Perspective.                                                      | International journal of environmental research and public health | 17     | 18                                |                | <a href="https://dx.doi.org/">https://dx.doi.org/</a> | Exclusion reason: Not along resettlement pathway;          |
| Kaya, Edip; Kilic, Cengiz; Karadag Caman, Ozge; Uner, Sarp                                                                                                                                                | 2019           | Posttraumatic Stress and Depression Among Syrian Refugees Living in Turkey: Findings From an Urban Sample.                                 | The Journal of nervous and mental disease                         | 207    | 12                                | 995-1000       | <a href="https://dx.doi.org/">https://dx.doi.org/</a> | Exclusion reason: Not along resettlement pathway;          |
| Keller, Allen S; Rosenfeld, Barry; Trinh-Shevrin, Chau; Meserve, Chris; Sachs, Emily; Leviss, Jonathan A; Singer, Elizabeth; Smith, Hawthorne; Wilkinson, John; Kim, Glen; Alden, Kathleen; Ford, Douglas | 2003           | Mental health of detained asylum seekers.                                                                                                  | Lancet (London, England)                                          | 362    | 9397                              | 1721-3         |                                                       | Exclusion reason: Not along resettlement pathway;          |
| Kennedy, J; Seymour, D J; Hummel, B J                                                                                                                                                                     | 1999           | A comprehensive refugee health screening program.                                                                                          | Public health reports (Washington, D.C. : 1974)                   | 114    | 5                                 | 469-77         |                                                       | Exclusion reason: Ineligible study design;                 |
| Kiat, Naama; Youngmann, Rafael; Lurie, Ido                                                                                                                                                                | 2017           | The emotional distress of asylum seekers in Israel and the characteristics of those seeking psychiatric versus medical help.               | Transcultural psychiatry                                          | 54     | 5-6                               | 575-594        | <a href="https://dx.doi.org/">https://dx.doi.org/</a> | Exclusion reason: Not a screening program;                 |
| Kim, Seong-Hyeon; Goodman, Grace M; Toruno, Joseph A; Sherry, Alissa R; Kim, Hee Kyung                                                                                                                    | 2015           | The cross-cultural validity of the MMPI-2-RF Higher-Order Scales in a sample of North Korean female refugees.                              | Assessment                                                        | 22     | 5                                 | 640-649        | <a href="http://dx.doi.org/">http://dx.doi.org/</a>   | Exclusion reason: Not a screening program;                 |
| Kira, Ibrahim A; Ramaswamy, Vidya; Lewandowski, Linda; Mohanesh, Jamal; Abdul-Khalek, Husam                                                                                                               | 2015           | Psychometric assessment of the Arabic version of the Internalized Stigma of Mental Illness (ISMI) measure in a refugee population.         | Transcultural psychiatry                                          | 52     | 5                                 | 636-58         | <a href="https://dx.doi.org/">https://dx.doi.org/</a> | Exclusion reason: Not along resettlement pathway;          |
| Kira, Ibrahim A; Templin, Thomas; Lewandowski, Linda; Ashby, Jeffery S; Oladele, Alwande; Odenat, Lydia                                                                                                   | 2012           | Cumulative Trauma Disorder scale (CTD): Two studies.                                                                                       | Psychology                                                        | 3      | 9                                 | 643-656        | <a href="http://dx.doi.org/">http://dx.doi.org/</a>   | Exclusion reason: Not along resettlement pathway;          |
| Kiselev, Nikolai; Pfaltz, Monique; Schick, Matthias; Bird, Martha; Pernille, Hansen; Sijbrandij, Marit; de Graaff, Anne M; Schnyder, Ulrich; Morina, Naser                                                | 2020           | Problems faced by Syrian refugees and asylum seekers in Switzerland.                                                                       | Swiss medical weekly                                              | 150    | d10, 100970884                    | w20381         | <a href="https://dx.doi.org/">https://dx.doi.org/</a> | Exclusion reason: Ineligible study design;                 |
| Kliem, Soren; Mosle, Thomas; Klatt, Thimna; Fleischer, Stephanie; Kudlacek, Dominic; Kroger, Christoph; Brahler, Elmar; Beutel, Manfred E; Wiltink, Jorg                                                  | 2016           | [Psychometric Evaluation of an Arabic Version of the PHQ-4 Based on a Representative Survey of Syrian Refugees].                           | Psychotherapie, Psychosomatik, medizinische Psychologie           | 66     | 9-10                              | 385-392        |                                                       | Exclusion reason: Not a screening program;                 |
| Kroger, Christoph; Frantz, Inga; Friel, Pauline; Heinrichs, Nina                                                                                                                                          | 2016           | Posttraumatic stress and depressive symptoms amongst asylum seekers: Screening in a State Refugee Reception Center.                        | PPmP: Psychotherapie Psychosomatik Medizinische Psychologie       | 66     | 9-10                              | 377-384        | <a href="http://dx.doi.org/">http://dx.doi.org/</a>   | Exclusion reason: Duplicate;                               |
| Kroger, Christoph; Frantz, Inga; Friel, Pauline; Heinrichs, Nina                                                                                                                                          | 2016           | [Posttraumatic Stress and Depressive Symptoms amongst Asylum Seekers].                                                                     | Psychotherapie, Psychosomatik, medizinische Psychologie           | 66     | 9-10                              | 377-384        |                                                       | Exclusion reason: Duplicate;                               |
| Kronick, Rachel                                                                                                                                                                                           | 2018           | Mental Health of Refugees and Asylum Seekers: Assessment and Intervention.                                                                 | Canadian journal of psychiatry. Revue canadienne de psychiatrie   | 63     | 5                                 | 290-296        | <a href="https://dx.doi.org/">https://dx.doi.org/</a> | Exclusion reason: Ineligible study design;                 |

| Authors                                                                                                                                     | Published Year | Title                                                                                                                                                    | Journal                                                           | Volume                        | Issue          | Pages     | DOI                                                  | Notes                                             |
|---------------------------------------------------------------------------------------------------------------------------------------------|----------------|----------------------------------------------------------------------------------------------------------------------------------------------------------|-------------------------------------------------------------------|-------------------------------|----------------|-----------|------------------------------------------------------|---------------------------------------------------|
| Laban, Cornelis J; Gernaat, Hajo B P E; Komprou, Ivan H; van der Tweel, Ingeborg; De Jong, Joop T V M                                       | 2005           | Postmigration living problems and common psychiatric disorders in Iraqi asylum seekers in the Netherlands.                                               | The Journal of nervous and mental disease                         | 193                           | 12             | 825-32    |                                                      | Exclusion reason: Not a screening program;        |
| Laugharne J.                                                                                                                                | 2012           | Investigating the mental health of refugees recently arrived in western Australia                                                                        | European Psychiatry                                               | 27                            | SUPPL. 1       |           | <a href="http://dx.doi.org/">http://dx.doi.org/</a>  | Exclusion reason: conference poster/ abstract;    |
| Laugharne J.; Thambiran A.; Liliee A.                                                                                                       | 2011           | Investigating the mental health of adult refugees recently arrived in Western Australia                                                                  | Australian and New Zealand Journal of Psychiatry                  | 45                            | O1             | A41       |                                                      | Exclusion reason: conference poster/ abstract;    |
| Laukamp A.; Prufer-Kramer L.; Fischer F.; Kramer A.                                                                                         | 2019           | Health of Syrian unaccompanied asylum seeking adolescents (UASA) at first medical examination in Germany in comparison to UASA from other world regions  | BMC International Health and Human Rights                         | 19                            | 1              | 5         | <a href="http://dx.doi.org/">http://dx.doi.org/</a>  | Exclusion reason: Ineligible study design;        |
| Laws, A; Patsalides, B                                                                                                                      | 1997           | Medical and psychological examination of women seeking asylum: documentation of human rights abuses.                                                     | Journal of the American Medical Women's Association (1972)        | 52                            | 4              | 185-7     |                                                      | Exclusion reason: Full text unavailable;          |
| Leiler, Anna; Bjärta, Anna; Ek Dahl, Johanna; Wasteson, Elisabet                                                                            | 2019           | Mental health and quality of life among asylum seekers and refugees living in refugee housing facilities in Sweden.                                      | Social Psychiatry & Psychiatric Epidemiology                      | 54                            | 5              | 543-551   | 10.1007/s00127-                                      | Exclusion reason: Ineligible study design;        |
| Leiler, Anna; Hollifield, Michael; Wasteson, Elisabet; Bjarta, Anna                                                                         | 2019           | Suicidal Ideation and Severity of Distress among Refugees Residing in Asylum Accommodations in Sweden.                                                   | International journal of environmental research and public health | 16                            | 15             |           | <a href="https://dx.doi.org/">https://dx.doi.org</a> | Exclusion reason: Ineligible study design;        |
| LeMaster JW, Broadbridge CL, Lumley MA, Arnetz JE, Arfken C, Fellers MD, Jamil H, Pole N, Arnetz BB                                         | 2017           | Acculturation and Post-Migration Psychological Symptoms Among Iraqi Refugees: a Path Analysis                                                            |                                                                   | Date of Publication: March 02 |                |           |                                                      | Exclusion reason: Duplicate;                      |
| Lepper, Leigh E Tenkku; Karamelic-Muratovic, Ajlina; Salas, Joanne; Pollard, C Alec; Karahodzic, Edina; Asher, Jaron                        | 2017           | Mental Health Screening in a Bosnian Refugee Population Using the Primary Care Behavioral Health Screener-Bosnian Translation.                           | Journal of clinical psychology in medical settings                | 24                            | 2              | 152-162   | <a href="https://dx.doi.org/">https://dx.doi.org</a> | Exclusion reason: Not along resettlement pathway; |
| Lies J.; Drummond S.                                                                                                                        | 2017           | Prevalence study of sleep disturbance, mental health, and psychosocial concerns among asylum seekers and refugees                                        | Journal of Sleep Research                                         | 26                            | Supplement 1   | 45-46     | <a href="http://dx.doi.org/">http://dx.doi.org/</a>  | Exclusion reason: Full text unavailable;          |
| Llosa, Augusto E; Van Ommeren, Mark; Kolappa, Kavitha; Ghantous, Zeina; Souza, Renato; Bastin, Pierre; Slavuckij, Andrej; Graiss, Rebecca F | 2017           | A two-phase approach for the identification of refugees with priority need for mental health care in Lebanon: a validation study.                        | BMC psychiatry                                                    | 17                            | 1              | 28        | <a href="https://dx.doi.org/">https://dx.doi.org</a> | Exclusion reason: Not along resettlement pathway; |
| Logie, Carmen H; Okumu, Moses; Mwima, Simon; Hakiza, Robert; Chemutai, Doreen; Kyambadde, Peter                                             | 2020           | Contextual factors associated with depression among urban refugee and displaced youth in Kampala, Uganda: findings from a cross-sectional study.         | Conflict and health                                               | 14                            | 101286573      | 45        | <a href="https://dx.doi.org/">https://dx.doi.org</a> | Exclusion reason: Not along resettlement pathway; |
| Lopes Cardozo, Barbara; Talley, Leisel; Burton, Ann; Crawford, Carol                                                                        | 2004           | Karenni refugees living in Thai-Burmese border camps: traumatic experiences, mental health outcomes, and social functioning.                             | Social science & medicine (1982)                                  | 58                            | 12             | 2637-44   |                                                      | Exclusion reason: Not along resettlement pathway; |
| Loutan, L; Bierens de Haan, D; Subilia, L                                                                                                   | 1997           | [The health of asylum seekers: from communicable disease screening to post-traumatic disorders].                                                         | Bulletin de la Societe de pathologie exotique (1990)              | 90                            | 4              | 233-7     |                                                      | Exclusion reason: Full text unavailable;          |
| Lupone C.D.; Cronkright P.                                                                                                                  | 2017           | Emotional distress screening tool as a predictor for medical utilization and disability: A retrospective analysis of refugees resettling in Syracuse, NY | Annals of Global Health                                           | 83                            | 1              | 172       |                                                      | Exclusion reason: Full text unavailable;          |
| M'zah, Skander; Lopes Cardozo, Barbara; Evans, Dabney P                                                                                     | 2019           | Mental Health Status and Service Assessment for Adult Syrian Refugees Resettled in Metropolitan Atlanta: A Cross-Sectional Survey.                       | Journal of immigrant and minority health                          | 21                            | 5              | 1019-1025 | <a href="https://dx.doi.org/">https://dx.doi.org</a> | Exclusion reason: Not along resettlement pathway; |
| Magdalini P.; Narring F.; Chamay-Weber C.                                                                                                   | 2018           | Health care needs for unaccompanied asylum-seeking adolescents: A retrospec-tive study from an adolescent health unit in switzerland                     | Journal of Adolescent Health                                      | 62                            | 2 Supplement 1 | S108-S109 |                                                      | Exclusion reason: Ineligible study design;        |
| Maldari, Toni; Elsley, Natasha; Rahim, Razlyn Abdul                                                                                         | 2019           | The health status of newly arrived Syrian refugees at the Refugee Health Service, South Australia, 2016.                                                 | Australian journal of general practice                            | 48                            | 7              | 480-486   | <a href="https://dx.doi.org/">https://dx.doi.org</a> | Exclusion reason: Not a screening program;        |
| Malekzai, A S; Niazi, J M; Paige, S R; Hendricks, S E; Fitzpatrick, D; Leuschen, M P; Millimet, C R                                         | 1996           | Modification of CAPS-1 for diagnosis of PTSD in Afghan refugees.                                                                                         | Journal of traumatic stress                                       | 9                             | 4              | 891-8     |                                                      | Exclusion reason: Not along resettlement pathway; |
| Malm, Andreas; Tinghog, Petter; Narusyte, Jurgita; Saboonchi, Fredrik                                                                       | 2020           | The refugee post-migration stress scale (RPMS) - development and validation among refugees from Syria recently resettled in Sweden.                      | Conflict and health                                               | 14                            | 101286573      | 2         | <a href="https://dx.doi.org/">https://dx.doi.org</a> | Exclusion reason: Not along resettlement pathway; |
| Marusic, Ana; Kozaric-Kovacic, Dragica; Folnegovic-Smalc, Vera; Ljubin, Tajana; et al                                                       | 1995           | Use of two PTSD scales in assessing posttraumatic stress disorder in refugees and displaced persons from Bosnia and Herzegovina and Croatia.             | Psychologische Beitrage                                           | 37                            | 1-2            | 209-214   |                                                      | Exclusion reason: Not along resettlement pathway; |
| Mazur V.; Chahraoui K.                                                                                                                      | 2011           | Psychopathology of asylum seekers in Slovak Republic. Case study of 40 asylum seekers                                                                    | Annales Medico-Psychologiques                                     | 169                           | 10             | 621-626   | <a href="http://dx.doi.org/">http://dx.doi.org/</a>  | Exclusion reason: Ineligible study design;        |
| Minhas, Ripudaman S; Graham, Hamish; Jegatheesan, Thivya; Huber, Joeline; Young, Elizabeth; Barozzino, Tony                                 | 2017           | Supporting the developmental health of refugee children and youth.                                                                                       | Paediatrics & child health                                        | 22                            | 2              | 68-71     | <a href="https://dx.doi.org/">https://dx.doi.org</a> | Exclusion reason: Ineligible study design;        |



| Authors                                                                                                                                                                           | Published Year | Title                                                                                                                                                                               | Journal                                                                                    | Volume | Issue          | Pages     | DOI                                                   | Notes                                                      |
|-----------------------------------------------------------------------------------------------------------------------------------------------------------------------------------|----------------|-------------------------------------------------------------------------------------------------------------------------------------------------------------------------------------|--------------------------------------------------------------------------------------------|--------|----------------|-----------|-------------------------------------------------------|------------------------------------------------------------|
| Mishori, Ranit; Aleinikoff, Shoshana; Davis, Dawn                                                                                                                                 | 2017           | Primary Care for Refugees: Challenges and Opportunities.                                                                                                                            | American family physician                                                                  | 96     | 2              | 112-120   |                                                       | Exclusion reason: Ineligible study design;                 |
| Mogos, Mulubrhan F.; Beckstead, Jason W.; Evans, Mary E.; Kip, Kevin E.; Boothroyd, Roger A.                                                                                      | 2019           | Forward-backward translation and cross-cultural validation of the Center for Epidemiologic Studies Depression scale among Tigrigna-speaking Eritrean refugees.                      | International Journal of Migration, Health & Social Care                                   | 15     | 2              | 163-176   | 10.1108/IJMHC                                         | Exclusion reason: Not along resettlement pathway;          |
| Mohler, Eva; Simons, Michael; Kolch, Michael; Herpertz-Dahlmann, Beate; Schulte-Markwort, Michael; Fegert, Jorg M                                                                 | 2015           | [Diagnoses and treatment of (unaccompanied) refugee minors - a major challenge for child and adolescent psychiatry in Germany].                                                     | Zeitschrift für Kinder- und Jugendpsychiatrie und Psychotherapie                           | 43     | 6              | 381-3     | <a href="https://dx.doi.org/">https://dx.doi.org/</a> | Exclusion reason: Full text unavailable;                   |
| Morville, Anne-Le; Erlandsson, Lena-Karin; Eklund, Mona; Danneskiold-Samsoe, Bente; Christensen, Robin; Amris, Kirstine                                                           | 2014           | Activity of daily living performance amongst Danish asylum seekers: a cross-sectional study.                                                                                        | Torture : quarterly journal on rehabilitation of torture victims and prevention of torture | 24     | 1              | 49-64     |                                                       | Exclusion reason: Not a screening program;                 |
| Mulhall D.J.                                                                                                                                                                      | 2003           | The psychological assessment of asylum seekers                                                                                                                                      | Clinical Psychology                                                                        |        | 22             | 4-6       |                                                       | Exclusion reason: Full text unavailable;                   |
| Muller, Lauritz Rudolf Floribert; Buter, Karl Philipp; Rosner, Rita; Unterhitzberger, Johanna                                                                                     | 2019           | Mental health and associated stress factors in accompanied and unaccompanied refugee minors resettled in Germany: a cross-sectional study.                                          | Child and adolescent psychiatry and mental health                                          | 13     | 101297974      | 8         | <a href="https://dx.doi.org/">https://dx.doi.org/</a> | Exclusion reason: Not along resettlement pathway;          |
| Muller, Matthias Johannes; Kamcili-Kubach, Suzan; Strassheim, Songul; Koch, Eckhardt                                                                                              | 2012           | Assessing stressors related to migration in patients with psychiatric disorders: Development and reliability of a standardized instrument (MIGSTR10).                               | European Journal of Psychological Assessment                                               | 28     | 4              | 262-269   | <a href="http://dx.doi.org/">http://dx.doi.org/</a>   | Exclusion reason: Population is not refugee/asylum seeker; |
| Nallusamy, Vasumathi; Afgarsh, Mohamud; Shlosser, Heather                                                                                                                         | 2016           | Reliability and validity of Somali version of the PHQ-9 in primary care practice.                                                                                                   | International journal of psychiatry in medicine                                            | 51     | 6              | 508-520   | <a href="https://dx.doi.org/">https://dx.doi.org/</a> | Exclusion reason: Population is not refugee/asylum seeker; |
| Nesterko, Y; Jackle, D; Friedrich, M; Holzapfel, L; Glaesmer, H                                                                                                                   | 2019           | Prevalence of post-traumatic stress disorder, depression and somatisation in recently arrived refugees in Germany: an epidemiological study.                                        | Epidemiology and psychiatric sciences                                                      | 29     | 101561091      | e40       | <a href="https://dx.doi.org/">https://dx.doi.org/</a> | Exclusion reason: Ineligible study design;                 |
| Nesterko, Yuriy; Jackle, David; Friedrich, Michael; Holzapfel, Laura; Glaesmer, Heide                                                                                             | 2020           | Health care needs among recently arrived refugees in Germany: a cross-sectional, epidemiological study.                                                                             | International journal of public health                                                     | 65     | 6              | 811-821   | <a href="https://dx.doi.org/">https://dx.doi.org/</a> | Exclusion reason: Not a screening program;                 |
| Nesterko, Yuriy; Jackle, David; Friedrich, Michael; Holzapfel, Laura; Glaesmer, Heide                                                                                             | 2020           | Factors predicting symptoms of somatization, depression, anxiety, post-traumatic stress disorder, self-rated mental and physical health among recently arrived refugees in Germany. | Conflict and health                                                                        | 14     | 101286573      | 44        | <a href="https://dx.doi.org/">https://dx.doi.org/</a> | Exclusion reason: Ineligible study design;                 |
| Nickerson, Angela; Schick, Matthias; Schnyder, Ulrich; Bryant, Richard A; Morina, Naser                                                                                           | 2017           | Comorbidity of Posttraumatic Stress Disorder and Depression in Tortured, Treatment-Seeking Refugees.                                                                                | Journal of traumatic stress                                                                | 30     | 4              | 409-415   | <a href="https://dx.doi.org/">https://dx.doi.org/</a> | Exclusion reason: Not along resettlement pathway;          |
| Nielsen, Signe Smith; Norredam, Marie; Christensen, Karen Louise; Obel, Carsten; Krasnik, Allan                                                                                   | 2007           | [The mental health of asylum-seeking children in Denmark].                                                                                                                          | Ugeskrift for læger                                                                        | 169    | 43             | 3660-5    |                                                       | Exclusion reason: Not along resettlement pathway;          |
| Nijman, Ruud Gerard; Krone, Johanna; Mintegi, Santiago; Bidlingmaier, Christoph; Maconochie, Ian K.; Lyttle, Mark D.; von Both, Ulrich                                            | 2021           | Emergency care provided to refugee children in Europe: RefuNET: a cross-sectional survey study.                                                                                     | Emergency Medicine Journal                                                                 | 38     | 1              | 5-13      | 10.1136/emerme                                        | Exclusion reason: Not a screening program;                 |
| Nose, Michela; Tarsitani, Lorenzo; Tedeschi, Federico; Lotito, Claudia; Massetti, Paola; Purgato, Marianna; Roselli, Valentina; Todini, Liliana; Turrini, Giulia; Barbui, Corrado | 2020           | Association of traumatic events with levels of psychological distress and depressive symptoms in male asylum seekers and refugees resettled in Italy.                               | BMC psychiatry                                                                             | 20     | 1              | 576       | <a href="https://dx.doi.org/">https://dx.doi.org/</a> | Exclusion reason: Not a screening program;                 |
| Nose, Michela; Turrini, Giulia; Imoli, Maria; Ballette, Francesca; Ostuzzi, Giovanni; Cucchi, Francesca; Padoan, Chiara; Ruggeri, Mirella; Barbui, Corrado                        | 2018           | Prevalence and Correlates of Psychological Distress and Psychiatric Disorders in Asylum Seekers and Refugees Resettled in an Italian Catchment Area.                                | Journal of immigrant and minority health                                                   | 20     | 2              | 263-270   | <a href="https://dx.doi.org/">https://dx.doi.org/</a> | Exclusion reason: Not along resettlement pathway;          |
| O'Laughlin K.N.; Xu A.; Ashaba S.; Khidir H.; Parker R.; Faustlin Z.; Muwonge T.; Tsai A.; Bassett L.; Strehlow M.                                                                | 2019           | Assessing the burden of mental illness among refugees in Uganda                                                                                                                     | Academic Emergency Medicine                                                                | 26     | Supplement 1   | S68       | <a href="http://dx.doi.org/">http://dx.doi.org/</a>   | Exclusion reason: Not along resettlement pathway;          |
| Oda, Anna; Tuck, Andrew; Agic, Branka; Hynie, Michaela; Roche, Brenda; McKenzie, Kwame                                                                                            | 2017           | Health care needs and use of health care services among newly arrived Syrian refugees: a cross-sectional study.                                                                     | CMAJ open                                                                                  | 5      | 2              | E354-E358 | <a href="https://dx.doi.org/">https://dx.doi.org/</a> | Exclusion reason: Ineligible study design;                 |
| Palic, Sabina; Kappel, Michelle Lind; Nielsen, Monica Stougaard; Carlsson, Jessica; Bech, Per                                                                                     | 2014           | Comparison of psychiatric disability on the health of nation outcome scales (HoNOS) in resettled traumatized refugee outpatients and Danish inpatients.                             | BMC psychiatry                                                                             | 14     | 100968559      | 330       | <a href="https://dx.doi.org/">https://dx.doi.org/</a> | Exclusion reason: Not along resettlement pathway;          |
| Patseadou M.; Liso-Navarro A.; Djapo S.; Narring F.                                                                                                                               | 2018           | Mental health care needs of unaccompanied asylum-seeking minors resettled in the canton of Geneva: The importance of networking                                                     | Swiss Medical Weekly                                                                       | 147    | Supplement 228 | 53S       |                                                       | Exclusion reason: conference poster/ abstract;             |
| Peltzer, K                                                                                                                                                                        | 1999           | Trauma and mental health problems of Sudanese refugees in Uganda.                                                                                                                   | The Central African journal of medicine                                                    | 45     | 5              | 110-4     |                                                       | Exclusion reason: Not along resettlement pathway;          |

| Authors                                                                                                                                                                   | Published Year | Title                                                                                                                                                                                                                   | Journal                                                           | Volume | Issue        | Pages   | DOI                                                   | Notes                                                      |
|---------------------------------------------------------------------------------------------------------------------------------------------------------------------------|----------------|-------------------------------------------------------------------------------------------------------------------------------------------------------------------------------------------------------------------------|-------------------------------------------------------------------|--------|--------------|---------|-------------------------------------------------------|------------------------------------------------------------|
| Pfeiffer, Elisa; Sukale, Thorsten; Muller, Lauritz Rudolf Floribert; Plener, Paul Lukas; Rosner, Rita; Fegert, Joerg Michael; Sachser, Cedric; Unterhutzenberger, Johanna | 2019           | The symptom representation of posttraumatic stress disorder in a sample of unaccompanied and accompanied refugee minors in Germany: a network analysis.                                                                 | European journal of psychotraumatology                            | 10     | 1            | 1675990 | <a href="https://dx.doi.org/">https://dx.doi.org/</a> | Exclusion reason: Ineligible study design;                 |
| Polcher, Kelly; Calloway, Susan                                                                                                                                           | 2016           | Addressing the Need for Mental Health Screening of Newly Resettled Refugees: A Pilot Project.                                                                                                                           | Journal of primary care & community health                        | 7      | 3            | 199-203 | <a href="https://dx.doi.org/">https://dx.doi.org/</a> | Exclusion reason: Duplicate;                               |
| Poole G.E.; Galpin G.                                                                                                                                                     | 2011           | Prevalence of victims of torture in the health screening of quota refugees in New Zealand during 2007-2008 and implications for follow-up care                                                                          | New Zealand Medical Journal                                       | 124    | 1338         | 18-24   |                                                       | Exclusion reason: Full text unavailable;                   |
| Poole, Danielle N; Liao, Shirley; Larson, Elysia; Hedt-Gauthier, Bethany; Raymond, Nathaniel A; Barnighausen, Till; Smith Fawzi, Mary C                                   | 2020           | Sequential screening for depression in humanitarian emergencies: a validation study of the Patient Health Questionnaire among Syrian refugees.                                                                          | Annals of general psychiatry                                      | 19     | 101236515    | 5       | <a href="https://dx.doi.org/">https://dx.doi.org/</a> | Exclusion reason: Not along resettlement pathway;          |
| Puric, Danka; Vukcevic Markovic, Masa                                                                                                                                     | 2019           | Development and validation of the Stressful Experiences in Transit Questionnaire (SET-Q) and its Short Form (SET-SF).                                                                                                   | European journal of psychotraumatology                            | 10     | 1            | 1611091 | <a href="https://dx.doi.org/">https://dx.doi.org/</a> | Exclusion reason: Ineligible study design;                 |
| Ramos, Katherine; Jones, Martine K; Shellman, Alison B; Dao, Tam K; Szeto, Kim                                                                                            | 2016           | Reliability and Validity of the Vietnamese Depression Interview (VDI).                                                                                                                                                  | Journal of immigrant and minority health                          | 18     | 4            | 799-809 | <a href="https://dx.doi.org/">https://dx.doi.org/</a> | Exclusion reason: Population is not refugee/asylum seeker; |
| Renner, Walter; Salem, Ingrid                                                                                                                                             | 2009           | Post-traumatic stress in asylum seekers and refugees from Chechnya, Afghanistan, and West Africa: gender differences in symptomatology and coping.                                                                      | The International journal of social psychiatry                    | 55     | 2            | 99-108  | <a href="https://dx.doi.org/">https://dx.doi.org/</a> | Exclusion reason: Ineligible study design;                 |
| Rodolico, Alessandro; Vaccino, Noemi; Riso, Maria C; Concerto, Carmen; Aguglia, Eugenio; Signorelli, Maria S                                                              | 2020           | Prevalence of Post-Traumatic Stress Disorder Among Asylum Seekers in Italy: A Population-Based Survey in Sicily.                                                                                                        | Journal of immigrant and minority health                          | 22     | 3            | 634-638 | <a href="https://dx.doi.org/">https://dx.doi.org/</a> | Exclusion reason: Not along resettlement pathway;          |
| Rothe, Eugenio M; Lewis, John; Castillo-Matos, Hector; Martinez, Orestes; Busquets, Ruben; Martinez, Igna                                                                 | 2002           | Posttraumatic stress disorder among Cuban children and adolescents after release from a refugee camp.                                                                                                                   | Psychiatric services (Washington, D.C.)                           | 53     | 8            | 970-6   |                                                       | Exclusion reason: Not a screening program;                 |
| Salt, Rebekah J; Costantino, Margaret E; Dotson, Emma L; Paper, Bruce M                                                                                                   | 2017           | "You Are Not Alone" Strategies for Addressing Mental Health and Health Promotion with a Refugee Women's Sewing Group.                                                                                                   | Issues in mental health nursing                                   | 38     | 4            | 337-343 | <a href="https://dx.doi.org/">https://dx.doi.org/</a> | Exclusion reason: Not a screening program;                 |
| Schnyder, Ulrich; Muller, Julia; Morina, Naser; Schick, Matthias; Bryant, Richard A; Nickerson, Angela                                                                    | 2015           | A Comparison of DSM-5 and DSM-IV Diagnostic Criteria for Posttraumatic Stress Disorder in Traumatized Refugees.                                                                                                         | Journal of traumatic stress                                       | 28     | 4            | 267-74  | <a href="https://dx.doi.org/">https://dx.doi.org/</a> | Exclusion reason: Not a screening program;                 |
| Schubert, Carla C; Punamaki, Raija-Leena                                                                                                                                  | 2011           | Mental health among torture survivors: cultural background, refugee status and gender.                                                                                                                                  | Nordic journal of psychiatry                                      | 65     | 3            | 175-82  | <a href="https://dx.doi.org/">https://dx.doi.org/</a> | Exclusion reason: Not along resettlement pathway;          |
| Semere W.; Agrawal P.; Yun K.; Di Bartolo I.M.; Annamalai A.; Ross J.S.                                                                                                   | 2016           | Timing of refugee health assessments may be associated with acute healthcare utilization                                                                                                                                | Journal of General Internal Medicine                              | 31     | 2 SUPPL. 1   | S440    |                                                       | Exclusion reason: conference poster/ abstract;             |
| Shaw, Stacey A.; Karim, Hamid; Bellows, Noelle; Pillai, Veena                                                                                                             | 2019           | Emotional distress among Rohingya refugees in Malaysia.                                                                                                                                                                 | Intervention (15718883)                                           | 17     | 2            | 174-180 | 10.4103/INTV.IN                                       | Exclusion reason: Not along resettlement pathway;          |
| Shin J.; Rosenberg L.M.; Ackerman K.; Minor M.; Shah P.                                                                                                                   | 2019           | Trauma exposure, health status, and disease burden among minors seeking asylum in the US                                                                                                                                | Journal of General Internal Medicine                              | 34     | 2 Supplement | S388    | <a href="http://dx.doi.org/">http://dx.doi.org/</a>   | Exclusion reason: conference poster/ abstract;             |
| Shoeb, Marwa; Weinstein, Harvey; Mollica, Richard                                                                                                                         | 2007           | The Harvard trauma questionnaire: adapting a cross-cultural instrument for measuring torture, trauma and posttraumatic stress disorder in Iraqi refugees.                                                               | The International journal of social psychiatry                    | 53     | 5            | 447-63  |                                                       | Exclusion reason: Duplicate;                               |
| Shrestha, N M; Sharma, B; Van Ommeren, M; Regmi, S; Makaju, R; Komproe, I; Shrestha, G B; de Jong, J T                                                                    | 1998           | Impact of torture on refugees displaced within the developing world: symptomatology among Bhutanese refugees in Nepal.                                                                                                  | JAMA                                                              | 280    | 5            | 443-8   |                                                       | Exclusion reason: Not along resettlement pathway;          |
| Sierau, Susan; Schneider, Esther; Nesterko, Yuri; von Klitzing, Kai; Glaesmer, Heide                                                                                      | 2019           | [Mental Health Problems of Unaccompanied Young Refugees in Youth Welfare Institutions].                                                                                                                                 | Psychiatrische Praxis                                             | 46     | 3            | 135-140 | <a href="https://dx.doi.org/">https://dx.doi.org/</a> | Exclusion reason: Not along resettlement pathway;          |
| Sigvardsson, Erika; Nilsson, Henrik; Malm, Andreas; Tinghog, Petter; Gottvall, Maria; Vaez, Marjan; Saboonchi, Fredrik                                                    | 2017           | Development and Preliminary Validation of Refugee Trauma History Checklist (RTHC)-A Brief Checklist for Survey Studies.                                                                                                 | International journal of environmental research and public health | 14     | 10           |         | <a href="https://dx.doi.org/">https://dx.doi.org/</a> | Exclusion reason: Not a screening program;                 |
| Silove, D; Sinnerbrink, I; Field, A; Manicavasagar, V; Steel, Z                                                                                                           | 1997           | Anxiety, depression and PTSD in asylum-seekers: associations with pre-migration trauma and post-migration stressors.                                                                                                    | The British journal of psychiatry : the journal of mental science | 170    | 0342367, b1k | 351-7   |                                                       | Exclusion reason: Ineligible study design;                 |
| Silove, Derrick; Tay, Alvin Kuowei; Kareth, Moses; Rees, Susan                                                                                                            | 2017           | The Relationship of Complex Post-traumatic Stress Disorder and Post-traumatic Stress Disorder in a Culturally Distinct, Conflict-Affected Population: A Study among West Papuan Refugees Displaced to Papua New Guinea. | Frontiers in psychiatry                                           | 8      | 101545006    | 73      | <a href="https://dx.doi.org/">https://dx.doi.org/</a> | Exclusion reason: Not along resettlement pathway;          |

| Authors                                                                                                                                                                                                                                                                                      | Published Year | Title                                                                                                                                                                                                  | Journal                                                                                                                                                                                 | Volume | Issue         | Pages     | DOI                                                   | Notes                                             |
|----------------------------------------------------------------------------------------------------------------------------------------------------------------------------------------------------------------------------------------------------------------------------------------------|----------------|--------------------------------------------------------------------------------------------------------------------------------------------------------------------------------------------------------|-----------------------------------------------------------------------------------------------------------------------------------------------------------------------------------------|--------|---------------|-----------|-------------------------------------------------------|---------------------------------------------------|
| Slewa-Younan, Shameran; Mond, Jonathan; Bussion, Elise; Mohammad, Yaser; Uribe Guajardo, Maria Gabriela; Smith, Mitchell; Milosevic, Diana; Lujic, Sanja; Jorm, Anthony Francis                                                                                                              | 2014           | Mental health literacy of resettled Iraqi refugees in Australia: knowledge about posttraumatic stress disorder and beliefs about helpfulness of interventions.                                         | BMC psychiatry                                                                                                                                                                          | 14     | 100968559     | 320       | <a href="https://dx.doi.org/">https://dx.doi.org/</a> | Exclusion reason: Not a screening program;        |
| Smid, Geert E; Lensvelt-Mulders, Gerty J L M; Knipscheer, Jeroen W; Gersons, Berthold P R; Kleber, Rolf J                                                                                                                                                                                    | 2011           | Late-onset PTSD in unaccompanied refugee minors: exploring the predictive utility of depression and anxiety symptoms.                                                                                  | Journal of clinical child and adolescent psychology : the official journal for the Society of Clinical Child and Adolescent Psychology, American Psychological Association, Division 53 | 40     | 5             | 742-55    | <a href="https://dx.doi.org/">https://dx.doi.org/</a> | Exclusion reason: Not a screening program;        |
| Smith Fawzi, M C; Murphy, E; Pham, T; Lin, L; Poole, C; Mollica, R F                                                                                                                                                                                                                         | 1997           | The validity of screening for post-traumatic stress disorder and major depression among Vietnamese former political prisoners.                                                                         | Acta psychiatrica Scandinavica                                                                                                                                                          | 95     | 2             | 87-93     |                                                       | Exclusion reason: Not along resettlement pathway; |
| Sorkin D.H.; Rizzo S.; Biegler K.; Sim S.E.; Nicholas E.; Chandler M.; Ngo-Metzger Q.; Paigne K.; Nguyen D.V.; Mollica R.                                                                                                                                                                    | 2019           | Novel Health Information Technology to Aid Provider Recognition and Treatment of Major Depressive Disorder and Posttraumatic Stress Disorder in Primary Care                                           | Medical Care                                                                                                                                                                            | 57     | Supplement 62 | S190-S196 | <a href="http://dx.doi.org/">http://dx.doi.org/</a>   | Exclusion reason: Not along resettlement pathway; |
| Sourander, A                                                                                                                                                                                                                                                                                 | 1998           | Behavior problems and traumatic events of unaccompanied refugee minors.                                                                                                                                | Child abuse & neglect                                                                                                                                                                   | 22     | 7             | 719-27    |                                                       | Exclusion reason: Not along resettlement pathway; |
| Sulaiman-Hill, Cheryl Mr; Thompson, Sandra C                                                                                                                                                                                                                                                 | 2010           | Selecting instruments for assessing psychological wellbeing in Afghan and Kurdish refugee groups.                                                                                                      | BMC research notes                                                                                                                                                                      | 3      | 101462768     | 237       | <a href="https://dx.doi.org/">https://dx.doi.org/</a> | Exclusion reason: Not along resettlement pathway; |
| Tay A.K.; Rees S.; Chen J.; Kareth M.; Mohsin M.; Silove D.                                                                                                                                                                                                                                  | 2015           | The Refugee-Mental Health Assessment Package (R-MHAP); rationale, development and first-stage testing amongst West Papuan refugees                                                                     | International Journal of Mental Health Systems                                                                                                                                          | 9      | 1             | 29        | <a href="http://dx.doi.org/">http://dx.doi.org/</a>   | Exclusion reason: Not along resettlement pathway; |
| Tay, Alvin Kuowei; Frommer, Naomi; Hunter, Jill; Silove, Derrick; Pearson, Linda; Roque, Mehera San; Redman, Ronnit; Bryant, Richard A; Manicavasagar, Vijaya; Steel, Zachary                                                                                                                | 2015           | "A mixed-method study of expert psychological evidence submitted for a cohort of asylum seekers undergoing refugee status determination in Australia": Corrigendum.                                    | Social Science & Medicine                                                                                                                                                               | 138    |               | 12        | <a href="http://dx.doi.org/">http://dx.doi.org/</a>   | Exclusion reason: Duplicate;                      |
| Tay, Alvin Kuowei; Rees, Susan; Miah, Mohammed Abdul Awal; Khan, Sanjida; Badrudduza, Mohammad; Morgan, Karen; Fadil Azim, Darlina; Balasundaram, Susheela; Silove, Derrick                                                                                                                  | 2019           | Functional impairment as a proxy measure indicating high rates of trauma exposure, post-migration living difficulties, common mental disorders, and poor health amongst Rohingya refugees in Malaysia. | Translational psychiatry                                                                                                                                                                | 9      | 1             | 213       | <a href="https://dx.doi.org/">https://dx.doi.org/</a> | Exclusion reason: Not along resettlement pathway; |
| Teodorescu, Dinu-Stefan; Heir, Trond; Hauff, Edvard; Wentzel-Larsen, Tore; Lien, Lars                                                                                                                                                                                                        | 2012           | Mental health problems and post-migration stress among multi-traumatized refugees attending outpatient clinics upon resettlement to Norway.                                                            | Scandinavian journal of psychology                                                                                                                                                      | 53     | 4             | 316-32    | <a href="https://dx.doi.org/">https://dx.doi.org/</a> | Exclusion reason: Not along resettlement pathway; |
| Thela, Lindokuhle; Tomita, Andrew; Maharaj, Varsha; Mhlongo, Mpho; Burns, Jonathan K                                                                                                                                                                                                         | 2017           | Counting the cost of Afrophobia: Post-migration adaptation and mental health challenges of African refugees in South Africa.                                                                           | Transcultural psychiatry                                                                                                                                                                | 54     | 5-6           | 715-732   | <a href="https://dx.doi.org/">https://dx.doi.org/</a> | Exclusion reason: Not along resettlement pathway; |
| Tibubos, Ana N; Kroger, Hannes                                                                                                                                                                                                                                                               | 2020           | A cross-cultural comparison of the ultrabrief mental health screeners PHQ-4 and SF-12 in Germany.                                                                                                      | Psychological assessment                                                                                                                                                                | 32     | 7             | 690-697   | <a href="https://dx.doi.org/">https://dx.doi.org/</a> | Exclusion reason: Not a screening program;        |
| Tomita, Andrew; Kandolo, Ka Muzombo; Susser, Ezra; Burns, Jonathan K                                                                                                                                                                                                                         | 2016           | Use of short messaging services to assess depressive symptoms among refugees in South Africa: Implications for social services providing mental health care in resource-poor settings.                 | Journal of telemedicine and telecare                                                                                                                                                    | 22     | 6             | 369-77    | <a href="https://dx.doi.org/">https://dx.doi.org/</a> | Exclusion reason: Not along resettlement pathway; |
| Uygun E.; Yildirim O.; Koseoglu A.; Erkoc S.                                                                                                                                                                                                                                                 | 2018           | Factors associated with PTSD in a group of Syrian refugee who applied to immigrant/refugee mental health special branch outpatient clinic                                                              | European Psychiatry                                                                                                                                                                     | 48     | Supplement 1  | S489      | <a href="http://dx.doi.org/">http://dx.doi.org/</a>   | Exclusion reason: conference poster/ abstract;    |
| Uygun, Ersin; Ilkkursun, Zeynep; Sijbrandij, Marit; Aker, A Tamer; Bryant, Richard; Cuijpers, Pim; Fuhr, Daniela C; de Graaff, Anne M; de Jong, Joop; McDaid, David; Morina, Naser; Park, A-La; Roberts, Bayard; Ventevogel, Peter; Yurtbakan, Taylan; Acarturk, Ceren; STRENGTHS consortium | 2020           | Protocol for a randomized controlled trial: peer-to-peer Group Problem Management Plus (PM+) for adult Syrian refugees in Turkey.                                                                      | Trials                                                                                                                                                                                  | 21     | 1             | 283       | <a href="https://dx.doi.org/">https://dx.doi.org/</a> | Exclusion reason: Ineligible study design;        |
| Vallieres, F; Ceannt, R; Daccache, F; Abou Daher, R; Sleiman, J; Gilmore, B; Byrne, S; Shevlin, M; Murphy, J; Hyland, P                                                                                                                                                                      | 2018           | ICD-11 PTSD and complex PTSD amongst Syrian refugees in Lebanon: the factor structure and the clinical utility of the International Trauma Questionnaire.                                              | Acta psychiatrica Scandinavica                                                                                                                                                          | 138    | 6             | 547-557   | <a href="https://dx.doi.org/">https://dx.doi.org/</a> | Exclusion reason: Not along resettlement pathway; |
| van Melle, Marije A; Lamkaddem, Majda; Stuiver, Martijn M; Gerritsen, Annette A M; Deville, Walter L J M; Essink-Bot, Marie-Louise                                                                                                                                                           | 2014           | Quality of primary care for resettled refugees in the Netherlands with chronic mental and physical health problems: a cross-sectional analysis of medical records and interview data.                  | BMC family practice                                                                                                                                                                     | 15     | 100967792     | 160       | <a href="https://dx.doi.org/">https://dx.doi.org/</a> | Exclusion reason: Ineligible study design;        |
| Van Ommeren, M; de Jong, J T; Sharma, B; Komproe, I; Thapa, S B; Cardena, E                                                                                                                                                                                                                  | 2001           | Psychiatric disorders among tortured Bhutanese refugees in Nepal.                                                                                                                                      | Archives of general psychiatry                                                                                                                                                          | 58     | 5             | 475-82    |                                                       | Exclusion reason: Not along resettlement pathway; |

| Authors                                                                                                                                                                                       | Published Year | Title                                                                                                                                                                                                       | Journal                                                                                    | Volume       | Issue             | Pages        | DOI                                                   | Notes                                             |
|-----------------------------------------------------------------------------------------------------------------------------------------------------------------------------------------------|----------------|-------------------------------------------------------------------------------------------------------------------------------------------------------------------------------------------------------------|--------------------------------------------------------------------------------------------|--------------|-------------------|--------------|-------------------------------------------------------|---------------------------------------------------|
| Van Ommeren, Mark; Sharma, Bhogendra; Sharma, Gyanendra K; Komproe, Ivan; Cardena, Etzel; de Jong, Joop T V M                                                                                 | 2002           | The relationship between somatic and PTSD symptoms among Bhutanese refugee torture survivors: examination of comorbidity with anxiety and depression.                                                       | Journal of traumatic stress                                                                | 15           | 5                 | 415-21       |                                                       | Exclusion reason: Not along resettlement pathway; |
| van Wyk, Sierra; Schweitzer, Robert; Brough, Mark; Vromans, Lyn; Murray, Kate                                                                                                                 | 2012           | A longitudinal study of mental health in refugees from Burma: the impact of therapeutic interventions.                                                                                                      | The Australian and New Zealand journal of psychiatry                                       | 46           | 10                | 995-1003     | <a href="https://dx.doi.org/">https://dx.doi.org/</a> | Exclusion reason: Not a screening program;        |
| Vang, Maria Louison; Nielsen, Sabrina Brodsgaard; Auning-Hansen, Mikkel; Elklit, Ask                                                                                                          | 2019           | Testing the validity of ICD-11 PTSD and CPTSD among refugees in treatment using latent class analysis.                                                                                                      | Torture : quarterly journal on rehabilitation of torture victims and prevention of torture | 29           | 3                 | 27-45        | <a href="https://dx.doi.org/">https://dx.doi.org/</a> | Exclusion reason: Not along resettlement pathway; |
| Velu, Bahrie; Leatham, Janet                                                                                                                                                                  | 2017           | Neuropsychological assessment of refugees: Methodological and cross-cultural barriers.                                                                                                                      | Applied neuropsychology. Adult                                                             | 24           | 6                 | 481-492      | <a href="https://dx.doi.org/">https://dx.doi.org/</a> | Exclusion reason: Not a screening program;        |
| Veronese, Guido; Pepe, Alessandro; Almumak, Feda; Jaradah, Alaa; Hamdouna, Husam                                                                                                              | 2018           | Quality of life, primary traumatisation, and positive and negative affects in primary school students in the Gaza Strip.                                                                                    | Lancet (London, England)                                                                   | 391 Suppl 2  | 2985213r, 10s, 0C | S14          | <a href="https://dx.doi.org/">https://dx.doi.org/</a> | Exclusion reason: Not along resettlement pathway; |
| Vitale, Agata; Ryde, Judy                                                                                                                                                                     | 2016           | Promoting male refugees' mental health after they have been granted leave to remain (refugee status).                                                                                                       | International Journal of Mental Health Promotion                                           | 18           | 2                 | 106-125      | <a href="http://dx.doi.org/">http://dx.doi.org/</a>   | Exclusion reason: Not a screening program;        |
| von Overbeck Ottino, Saskia; Passini, Christina Moses; Schechter, Daniel S.                                                                                                                   | 2018           | Perinatal Mental Health Screening and Consultation Model for Refugee Women and Their Infants.                                                                                                               | Zero to Three                                                                              | 38           | 4                 | 72-74        |                                                       | Exclusion reason: Ineligible study design;        |
| Vonnahme, Laura A; Lankau, Emily W; Ao, Trong; Shetty, Sharmila; Cardozo, Barbara Lopes                                                                                                       | 2015           | Factors Associated with Symptoms of Depression Among Bhutanese Refugees in the United States.                                                                                                               | Journal of immigrant and minority health                                                   | 17           | 6                 | 1705-14      | <a href="https://dx.doi.org/">https://dx.doi.org/</a> | Exclusion reason: Not along resettlement pathway; |
| Vromans, Lyn; Schweitzer, Robert D; Brough, Mark; Correa-Velez, Ignacio; Murray, Kate; Lenette, Caroline                                                                                      | 2019           | Psychometric Properties of the Multidimensional Loss Scale with Refugee Women-at-Risk Recently Arrived in Australia.                                                                                        | Journal of immigrant and minority health                                                   | 21           | 2                 | 271-277      | <a href="https://dx.doi.org/">https://dx.doi.org/</a> | Exclusion reason: Not a screening program;        |
| Walg, Marco; Fink, Ewgeni; Grosmeier, Mark; Temprano, Miguel; Hapfelmeier, Gerhard                                                                                                            | 2017           | [The proportion of unaccompanied refugee minors suffering from psychiatric disorders in Germany].                                                                                                           | Zeitschrift fur Kinder- und Jugendpsychiatrie und Psychotherapie                           | 45           | 1                 | 58-68        | <a href="https://dx.doi.org/">https://dx.doi.org/</a> | Exclusion reason: Full text unavailable;          |
| Walker, Sophie; von Werthern, Martha; Brady, Francesca; Katona, Cornelius                                                                                                                     | 2020           | Mental health of forced migrants recently granted leave to remain in the United Kingdom.                                                                                                                    | The International journal of social psychiatry                                             | gt5, 0374726 | 2076402093961     |              | <a href="https://dx.doi.org/">https://dx.doi.org/</a> | Exclusion reason: Not a screening program;        |
| Weine, S M; Becker, D F; McGlashan, T H; Laub, D; Lazrove, S; Vojvoda, D; Hyman, L                                                                                                            | 1995           | Psychiatric consequences of "ethnic cleansing": clinical assessments and trauma testimonies of newly resettled Bosnian refugees.                                                                            | The American journal of psychiatry                                                         | 152          | 4                 | 536-42       |                                                       | Exclusion reason: Not a screening program;        |
| Weine, Stevan M; Raina, Dheeraj; Zhubi, Merita; Delesi, Mejreme; Huseni, Dzana; Feetham, Suzanne; Kulauzovic, Yasmina; Mermelstein, Robin; Campbell, Richard T; Rolland, John; Pavkovic, Ivan | 2003           | The TAFES multi-family group intervention for Kosovar refugees: a feasibility study.                                                                                                                        | The Journal of nervous and mental disease                                                  | 191          | 2                 | 100-7        |                                                       | Exclusion reason: Not a screening program;        |
| Westermeyer, Joseph J; Campbell, Robyn; Lien, Rebecca; Spring, Marline; Johnson, David R; Butcher, James; Hyland, Jacqueline; Thuras, Paul; Jaranson, James M                                 | 2010           | HADStress: a somatic symptom screen for posttraumatic stress among Somali refugees.                                                                                                                         | Psychiatric services (Washington, D.C.)                                                    | 61           | 11                | 1132-7       | <a href="https://dx.doi.org/">https://dx.doi.org/</a> | Exclusion reason: Not along resettlement pathway; |
| Willey, Suzanne M; Blackmore, Rebecca P; Gibson-Helm, Melanie E; Ali, Razia; Boyd, Leanne M; McBride, Jacqueline; Boyle, Jacqueline A                                                         | 2020           | "If you don't ask ... you don't tell": Refugee women's perspectives on perinatal mental health screening.                                                                                                   | Women and birth : journal of the Australian College of Midwives                            | 33           | 5                 | e429-e437    | <a href="https://dx.doi.org/">https://dx.doi.org/</a> | Exclusion reason: Not along resettlement pathway; |
| Wind, Tim R; van der Aa, Niels; Knipscheer, Jeroen; de la Rie, Simone                                                                                                                         | 2017           | "The assessment of psychopathology among traumatized refugees: Measurement invariance of the Harvard Trauma Questionnaire and the Hopkins Symptom Checklist-25 across five linguistic groups": Corrigendum. | European Journal of Psychotraumatology                                                     | 8 Suppl 2    |                   | No-Specified | <a href="http://dx.doi.org/">http://dx.doi.org/</a>   | Exclusion reason: Not along resettlement pathway; |
| Young P.                                                                                                                                                                                      | 2014           | Mental health screening and outcome measures in immigration detention                                                                                                                                       | Australian and New Zealand Journal of Psychiatry                                           | 48           | SUPPL. 1          | 92-93        | <a href="http://dx.doi.org/">http://dx.doi.org/</a>   | Exclusion reason: conference poster/ abstract;    |
