# Supplementary material for: Mental Health Screening Approaches for Resettling Refugees and Asylum Seekers: A Scoping Review
Source: Int J Environ Res Public Health. 2022 Mar 16;19(6):3549. doi: 10.3390/ijerph19063549 (PMC8953108; doi:10.3390/ijerph19063549)
Supplement: Supplementary file 1 [file ijerph-19-03549-s001.zip]

Archive with 5 entries (5 files):
- Supplementary File S1_ List of resettlement states.pdf
- Supplementary File S2_ PRISMA-ScR.pdf
- Supplementary File S3_ PRISMA-S Checklist.pdf
- Supplementary File S4_ Search Strategies.pdf
- Supplementary File S5_ Excluded studies.pdf
